# Supplementary material
Source: PubMed Central journal article supplement (PMC5885928)
Supplement: jamainternmed-178-363-s001.pdf [file jamainternmed-178-363-s001.pdf]

## Supplementary Online Content

Geldsetzer P, Manne-Goehler J, Theilmann M, et al. Diabetes and hypertension in India: a nationally representative study of 1.3 million adults *JAMA Intern Med*. Published online January 29, 2018. doi:10.1001/jamainternmed.2017.8094

Supplement. **eMethods 1.** Methodology of the AHS and DLHS-4

**eFigure 1.** States and Union Territories covered by each survey

**eMethods 2.** Matching Annual Health Survey biomarker data to participants' socio-demographic data

**eMethods 3.** Computation of the household wealth index

**eMethods 4.** Computation of sampling weights

**eTable 1.** Sample characteristics stratified by whether the blood glucose or blood pressure measurement was missing

**eTable 2.** National diabetes and hypertension prevalence by age group and sex

**eTable 3.** National diabetes prevalence assuming all AHS respondents were unfasted

**eFigure 2.** Hypertension prevalence by five-year age group for India and WHO/NCD-RisC regions

**eFigure 3.** Prevalence of diabetes by rural versus urban residence, sex, and household wealth quintile assuming all AHS respondents were unfasted

**eFigure 4.** Prevalence of diabetes and hypertension by rural versus urban residence, sex, and education

**eFigure 5.** Prevalence of diabetes by rural versus urban residence, sex, and education assuming all AHS respondents were unfasted

**eTable 4.** Regression results for diabetes assuming all AHS participants were unfasted

**eTable 5.** Regression results for diabetes among those in whom fasting status could be ascertained (i.e., DLHS-4 participants only)

**eFigure 6.** The predicted probability of diabetes by age group, rural-urban location, and household wealth quintile assuming AHS participants were unfasted

**eFigure 7.** The predicted probability of diabetes by age group, rural-urban location, and household wealth quintile among those in whom fasting status could be ascertained (i.e., DLHS-4 participants only)

**eTable 6.** State-level age-standardized diabetes and hypertension prevalence estimates by sex

**eTable 7.** State-level age-standardized diabetes and hypertension prevalence estimates by rural versus urban location

**eTable 8.** State-level crude diabetes and hypertension prevalence estimates by age group

**eTable 9.** State-level age-standardized diabetes prevalence estimates by sex assuming all AHS respondents were unfasted

**eTable 10.** State-level age-standardized diabetes prevalence estimates by rural versus urban location assuming all AHS respondents were unfasted

**eTable 11.** State-level crude diabetes prevalence estimates by age group assuming all AHS respondents were unfasted

**eFigure 8.** Association of the state- and district-level age-standardized prevalence of diabetes with mean household wealth quintile

**eFigure 9.** Association of the state- and district-level age-standardized prevalence of hypertension with mean household wealth quintile

**eFigure 10.** Comparison of age-standardized national diabetes prevalence reported in different studies

## **eReferences**

This supplementary material has been provided by the authors to give readers additional information about their work.

## **eMethods 1. Methodology of the AHS and DLHS-4**

We pooled data from two large household surveys in India: The District-Level Household Survey-4 (DLHS-4) and the second update of the Annual Health Survey (AHS). eFigure1 shows the states and Union Territories covered by each survey. Both surveys are representative at the district level. They jointly cover all 29 states of India except Jammu and Kashmir (data were not collected due to violent conflicts) and Gujarat (data were not available in the public domain), and five of India's seven Union Territories (data were not available for Dadra and Nagar Haveli, and Lakshadweep). The two states and two Union Territories not included in this analysis only accounted for 6% of India's population in 2011 (the time of the last census).<sup>1</sup> Both surveys administered a questionnaire to the household head to ascertain socio-demographic information for each household member (regardless of whether the individual was present or absent at the time of the interviewer's visit), and measured blood glucose (BG) and blood pressure (BP) in each household member aged 18 years and older. All participants were asked to fast overnight until the time of the BG measurement in the morning. BG was measured once using the SD CodeFree handheld glucometer. BP was measured twice in the left upper arm (with the patient sitting) using an electronic BP monitor (Rossmax AW150). Data collectors were instructed to ensure a gap of at least three minutes between BP measurements. As part of the standard protocol, participants were asked to place their left arm on a flat surface (palm facing up) with the center of the upper arm being at approximately the same height as the heart, and instructed to refrain from talking during the measurement.

### *Annual Health Survey:*

Data for the AHS were collected between 2012 and 2013 in all 284 districts of nine states of India, which were selected because they had the highest rate of infant and child mortality in the country in 2010.<sup>2</sup> The two-stage cluster random sampling design of the AHS was self-weighting at the district level. In the first stage, villages in rural areas and census enumeration blocks in urban areas were selected through simple random sampling with probability proportional to population size (using projections from the 2001 India Census). In the second stage, households were selected through systematic random sampling (sampling the first household randomly, and then selecting every alternate household). The AHS dataset containing participants' socio-demographic information was merged with the dataset containing BP measurements as outlined in eMethods2.

*District-Level Household Survey-4:*

Data for the DLHS-4 were collected between 2012 and 2014 in all 336 districts of 18 states and five Union Territories (also referred to as ‘states’ in the manuscript) of India.<sup>2</sup> In the first stage, census villages in rural areas were selected through probability proportional to population size (again, using projections from the 2001 India Census), and urban frame survey blocks in urban areas through simple random sampling. In the second stage, households were selected through systematic random sampling.<sup>3</sup>

eFigure 1. States and Union Territories covered by each survey<sup>a</sup>

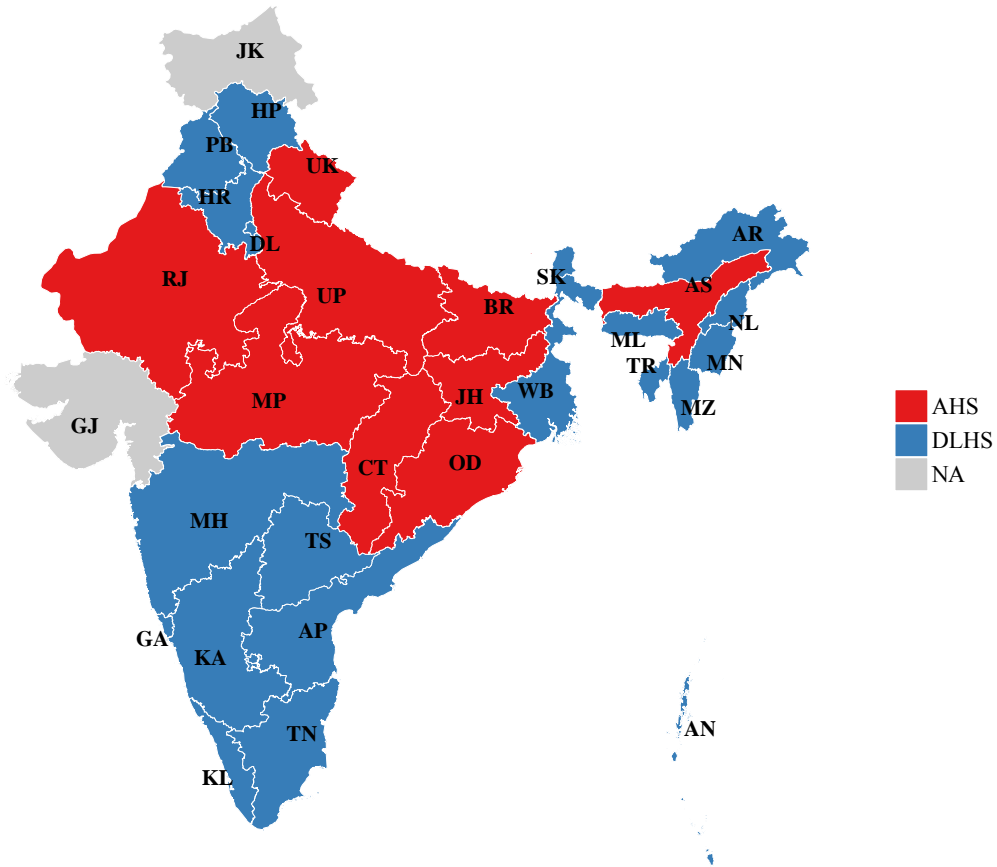

<sup>a</sup> The Union Territories, Chandigarh, Daman and Diu, and Puducherry, which were all covered by the DLHS-4, are not visible in the map due to their small area.

**Abbreviations:** AP, Andhra Pradesh; AR, Arunachal Pradesh; AS, Assam; BR, Bihar; CT, Chhattisgarh; DL, Delhi; GA, Goa; GJ, Gujarat; HR, Haryana; HP, Himachal Pradesh; JK, Jammu & Kashmir; JH, Jharkhand; KA, Karnataka; KL, Kerala; MP, Madhya Pradesh; MH, Maharashtra; MN, Manipur; ML, Meghalaya; MZ, Mizoram; NL, Nagaland; OD, Odisha (Orissa); PB, Punjab; RJ, Rajasthan; SK, Sikkim; TN, Tamil Nadu; TS, Telangana State; TR, Tripura; UP, Uttar Pradesh; UK, Uttarakhand (Uttaranchal); WB, West Bengal

## eMethods 2. Matching Annual Health Survey biomarker data to participants' socio-demographic data

Annual Health Survey (AHS) data in the public domain does not have a unique identifier that allows for merging of the 'laboratory dataset', which contains BG and BP measurements, to the dataset that contains respondents' full socio-demographic information. We thus merged these datasets using an indicator composed of the state, district, stratum (indicating rural versus urban location and village size), a household identifier that is unique within each primary sampling unit, and a household member serial number given during data entry as well as one assigned after data entry.

607,227 out of 1,028,545 (59.0%) non-pregnant adults in the laboratory dataset were successfully matched to their corresponding socio-demographic information. As detailed in the tables below, participants who were not matched had similar characteristics as those who were matched. Participants were merged independently of whether their BG or BP measurement was missing.

*Across all nine AHS states:*

| <b>Variable</b>                     | <b>Matched<br/><i>n</i>=607,227</b> | <b>Not matched<br/><i>n</i>=421,318</b> |
|-------------------------------------|-------------------------------------|-----------------------------------------|
| Male (%)                            | 50.7                                | 48.4                                    |
| Age (mean ± SD)                     | 40.8±15.9                           | 38.9±17.0                               |
| Diabetes (%)                        | 7.0                                 | 6.3                                     |
| Plasma glucose in mg/dl (mean ± SD) | 108.4±21.7                          | 108.0±21.3                              |
| Hypertension (%)                    | 22.3                                | 21.0                                    |
| Systolic BP (mean ± SD)             | 123.4±18.9                          | 122.6±19.1                              |
| Diastolic BP (mean ± SD)            | 77.9±12.5                           | 77.3±12.3                               |
| Urban (%)                           | 19.4                                | 18.0                                    |

Abbreviations: BP=blood pressure; SD=standard deviation; mg=milligram; dl= deciliter.

*Assam:*

| <b>Variable</b>                     | <b>Matched</b><br><i>n=62,882</i> | <b>Not matched</b><br><i>n=23,626</i> |
|-------------------------------------|-----------------------------------|---------------------------------------|
| Male (%)                            | 51.3                              | 44.5                                  |
| Age (mean ± SD)                     | 40.3±14.9                         | 37.1±16.1                             |
| Diabetes (%)                        | 7.5                               | 7.3                                   |
| Plasma glucose in mg/dl (mean ± SD) | 109.4±21.5                        | 108.5±21.3                            |
| Hypertension (%)                    | 24.2                              | 19.7                                  |
| Systolic BP (mean ± SD)             | 125.7±17.6                        | 123.3±17.5                            |
| Diastolic BP (mean ± SD)            | 79.5±11.8                         | 77.9±11.5                             |
| Urban (%)                           | 16.8                              | 19.8                                  |

Abbreviations: BP=blood pressure; SD=standard deviation; mg=milligram; dl= deciliter.

*Bihar:*

| <b>Variable</b>                     | <b>Matched</b><br><i>n=71,861</i> | <b>Not matched</b><br><i>n=80,049</i> |
|-------------------------------------|-----------------------------------|---------------------------------------|
| Male (%)                            | 49.6                              | 53.5                                  |
| Age (mean ± SD)                     | 40.8±15.9                         | 38.3±16.9                             |
| Diabetes (%)                        | 6.9                               | 5.3                                   |
| Plasma glucose in mg/dl (mean ± SD) | 106.7±19.8                        | 104.5±18.6                            |
| Hypertension (%)                    | 22.7                              | 18.8                                  |
| Systolic BP (mean ± SD)             | 123.7±18.6                        | 120.9±17.5                            |
| Diastolic BP (mean ± SD)            | 77.9±12.8                         | 77.2±11.6                             |
| Urban (%)                           | 9.6                               | 8.3                                   |

Abbreviations: BP=blood pressure; SD=standard deviation; mg=milligram; dl= deciliter.

*Chhattisgarh:*

| <b>Variable</b>                     | <b>Matched</b><br><i>n=37,579</i> | <b>Not matched</b><br><i>n=19,997</i> |
|-------------------------------------|-----------------------------------|---------------------------------------|
| Male (%)                            | 52.6                              | 48.4                                  |
| Age (mean ± SD)                     | 39.9±14.9                         | 38.8±16.1                             |
| Diabetes (%)                        | 8.8                               | 9.2                                   |
| Plasma glucose in mg/dl (mean ± SD) | 110.0±19.2                        | 110.1±21.0                            |
| Hypertension (%)                    | 18.1                              | 18.7                                  |
| Systolic BP (mean ± SD)             | 123.1±16.5                        | 123.2±17.2                            |
| Diastolic BP (mean ± SD)            | 77.7±11.9                         | 77.5±12.2                             |
| Urban (%)                           | 19.1                              | 22.2                                  |

Abbreviations: BP=blood pressure; SD=standard deviation; mg=milligram; dl= deciliter.

*Jharkhand:*

| <b>Variable</b>                     | <b>Matched</b><br><i>n=35,721</i> | <b>Not matched</b><br><i>n=18,875</i> |
|-------------------------------------|-----------------------------------|---------------------------------------|
| Male (%)                            | 44.8                              | 43.6                                  |
| Age (mean ± SD)                     | 40.6±15.5                         | 39.1±16.8                             |
| Diabetes (%)                        | 6.8                               | 5.4                                   |
| Plasma glucose in mg/dl (mean ± SD) | 105.4±24.8                        | 103.9±21.7                            |
| Hypertension (%)                    | 25.0                              | 24.3                                  |
| Systolic BP (mean ± SD)             | 123.0±20.0                        | 122.7±19.9                            |
| Diastolic BP (mean ± SD)            | 77.8±13.3                         | 77.5±13.2                             |
| Urban (%)                           | 17.6                              | 22.2                                  |

Abbreviations: BP=blood pressure; SD=standard deviation; mg=milligram; dl= deciliter.

*Madhya Pradesh:*

| <b>Variable</b>                     | <b>Matched</b><br><i>n=101,896</i> | <b>Not matched</b><br><i>n=63,056</i> |
|-------------------------------------|------------------------------------|---------------------------------------|
| Male (%)                            | 54.4                               | 51.1                                  |
| Age (mean ± SD)                     | 40.0±15.8                          | 38.9±16.8                             |
| Diabetes (%)                        | 6.2                                | 5.4                                   |
| Plasma glucose in mg/dl (mean ± SD) | 107.3±20.0                         | 107.3±19.0                            |
| Hypertension (%)                    | 21.7                               | 21.2                                  |
| Systolic BP (mean ± SD)             | 124.6±18.1                         | 124.3±17.8                            |
| Diastolic BP (mean ± SD)            | 79.8±11.4                          | 79.6±11.1                             |
| Urban (%)                           | 32.4                               | 28.9                                  |

Abbreviations: BP=blood pressure; SD=standard deviation; mg=milligram; dl= deciliter.

*Odisha:*

| <b>Variable</b>                     | <b>Matched</b><br><i>n=92,000</i> | <b>Not matched</b><br><i>n=21,570</i> |
|-------------------------------------|-----------------------------------|---------------------------------------|
| Male (%)                            | 49.2                              | 43.8                                  |
| Age (mean ± SD)                     | 42.2±16.0                         | 39.2±17.5                             |
| Diabetes (%)                        | 7.0                               | 6.4                                   |
| Plasma glucose in mg/dl (mean ± SD) | 107.6±24.0                        | 106.3±23.2                            |
| Hypertension (%)                    | 20.2                              | 18.6                                  |
| Systolic BP (mean ± SD)             | 120.7±19.8                        | 119.6±19.8                            |
| Diastolic BP (mean ± SD)            | 75.4±13.2                         | 74.8±13.1                             |
| Urban (%)                           | 14.3                              | 13.2                                  |

Abbreviations: BP=blood pressure; SD=standard deviation; mg=milligram; dl= deciliter.



*Rajasthan:*

| <b>Variable</b>                     | <b>Matched</b><br><i>n=81,931</i> | <b>Not matched</b><br><i>n=25,974</i> |
|-------------------------------------|-----------------------------------|---------------------------------------|
| Male (%)                            | 49.6                              | 44.6                                  |
| Age (mean ± SD)                     | 41.0±16.1                         | 37.9±17.5                             |
| Diabetes (%)                        | 6.9                               | 6.2                                   |
| Plasma glucose in mg/dl (mean ± SD) | 109.7±20.4                        | 109.0±19.7                            |
| Hypertension (%)                    | 22.8                              | 20.9                                  |
| Systolic BP (mean ± SD)             | 122.9±18.5                        | 121.9±18.3                            |
| Diastolic BP (mean ± SD)            | 78.7±11.9                         | 78.2±11.8                             |
| Urban (%)                           | 17.7                              | 17.1                                  |

Abbreviations: BP=blood pressure; SD=standard deviation; mg=milligram; dl= deciliter.

*Uttar Pradesh:*

| <b>Variable</b>                     | <b>Matched</b><br><i>n=103,384</i> | <b>Not matched</b><br><i>n=148,213</i> |
|-------------------------------------|------------------------------------|----------------------------------------|
| Male (%)                            | 51.6                               | 47.9                                   |
| Age (mean ± SD)                     | 40.4±16.3                          | 39.4±17.2                              |
| Diabetes (%)                        | 6.9                                | 6.2                                    |
| Plasma glucose in mg/dl (mean ± SD) | 110.4±22.0                         | 110.2±22.3                             |
| Hypertension (%)                    | 21.8                               | 22.0                                   |
| Systolic BP (mean ± SD)             | 123.1±20.0                         | 122.9±20.6                             |
| Diastolic BP (mean ± SD)            | 76.2±13.0                          | 76.1±13.0                              |
| Urban (%)                           | 21.3                               | 17.5                                   |

Abbreviations: BP=blood pressure; SD=standard deviation; mg=milligram; dl= deciliter.

*Uttarakhand:*

| <b>Variable</b>                     | <b>Matched</b><br><i>n=19,973</i> | <b>Not matched</b><br><i>n=19,958</i> |
|-------------------------------------|-----------------------------------|---------------------------------------|
| Male (%)                            | 47.0                              | 42.6                                  |
| Age (mean ± SD)                     | 42.7±16.6                         | 40.1±17.3                             |
| Diabetes (%)                        | 8.0                               | 7.3                                   |
| Plasma glucose in mg/dl (mean ± SD) | 109.6±25.2                        | 111.3±25.9                            |
| Hypertension (%)                    | 32.1                              | 25.9                                  |
| Systolic BP (mean ± SD)             | 127.2±19.6                        | 124.0±20.1                            |
| Diastolic BP (mean ± SD)            | 81.5±11.8                         | 79.2±12.3                             |
| Urban (%)                           | 22.0                              | 21.3                                  |

Abbreviations: BP=blood pressure; SD=standard deviation; mg=milligram; dl= deciliter.

### eMethods 3. Computation of the household wealth index

While neither the AHS nor the DLHS-4 contained information on household income or expenditure, they both asked about household characteristics and ownership of durable assets, which allows for the creation of a household wealth index. We created a household wealth index through a Principal Component Analysis (PCA) using the methodology developed by Filmer and Pritchett.<sup>4</sup> The advantage of a PCA is that the weights attributed to each asset or housing characteristic (henceforth assets) are not determined arbitrarily by the authors but instead are data-driven.

As a first step, a binary indicator was generated for each asset. Data on the following assets were available in both surveys and coded as being equal to one if the household head reported owning or having access to the asset: improved water supply (private or public access to piped water, hand pump, tube well, borehole or protected dug well); improved sanitation facility (not shared (pour) flush toilet, Ventilated Improved Pit or pit latrine with slab), modern cooking fuel (liquefied petroleum gas, electricity, biogas), house structure (pucca), clean source of lighting (electricity, solar), house ownership, and land ownership. Furthermore, indicators for each of the following assets were set to one if the household head reported owning at least one item of the following durable goods: radio, television, phone, fridge, bike, scooter, car, computer, washing machine, and sewing machine.

As a second step, the PCA was run separately for urban and rural areas on these binary indicator variables and the first (unrotated) principal component was extracted. The first principal component contains the largest part of the information on the variation in asset ownership and was used to predict the asset score of each household. The asset score has a mean of zero and standard deviation of one with lower asset scores indicating less wealth. To improve interpretability, the asset score was divided into quintiles (again, separately for rural and urban areas).

*Variables used to calculate the household wealth index:*

| <b>Asset</b>                 | <b>Coded as 1</b>                                                                                                                       | <b>Coded as 0</b>                                                               |
|------------------------------|-----------------------------------------------------------------------------------------------------------------------------------------|---------------------------------------------------------------------------------|
| Improved water supply        | Piped water into dwelling, yard or plot; public tap or standpipe; hand pump; tube well or borehole; protected dug well                  | Tanker, truck or cart with small tank; surface water;                           |
| Improved sanitation facility | If not shared: (Pour) flush connected to piped sewer system, septic tank or pit latrine; Ventilated Improved Pit; pit latrine with slab | Any shared facility; pit latrine without slab; service latrine; open defecation |
| Cooking fuel                 | LPG; electricity; biogas                                                                                                                | Firewood; crop residue; cow dung                                                |

|                    |                                              |                                              |
|--------------------|----------------------------------------------|----------------------------------------------|
|                    |                                              | cake; coal, lignite or charcoal;<br>kerosene |
| House structure    | Pucca                                        | Semi-Pucca, Kuccha                           |
| Source of lighting | Electricity; solar                           | Kerosene, other oils, none                   |
| Ownership of house | Owned                                        | Rented                                       |
| land               | Ownership of any land                        | No land owned                                |
| Radio              | Household owns at least one of<br>this asset | Household does not own this asset            |
| TV                 |                                              |                                              |
| Phone              |                                              |                                              |
| Fridge             |                                              |                                              |
| Bike               |                                              |                                              |
| Scooter            |                                              |                                              |
| Car                |                                              |                                              |
| Computer           |                                              |                                              |
| Washing machine    |                                              |                                              |
| Sewing machine     |                                              |                                              |

#### **eMethods 4. Computation of sampling weights**

The AHS is self-weighting at the district level. For AHS respondents, we therefore computed weights that consisted of the proportion that is obtained when dividing the relative population size of a district (i.e., population size of the district divided by the population size across all nine AHS states) by the relative sample size of a district (i.e., sample size of the district divided by total AHS sample size across all nine states). For DLHS-4 respondents the same weight was computed as above for the AHS, which was then multiplied by the weights given in the DLHS-4 dataset that adjust for the complex survey design (the DLHS-4 is not self-weighting). Lastly, the weights were adjusted for the fact that the AHS sample size is smaller relative to the population it represents than the DLHS-4 sample size. These weights were used to calculate all crude prevalence estimates provided in the manuscript.

To obtain age-standardized prevalence estimates, the weights for the crude prevalence estimates were multiplied by the proportion of adults in the respondent's five-year age group in the WHO reference population.<sup>5</sup> Code for the computation of these sampling weights can be obtained from the corresponding author.

**eTable 1. Sample characteristics stratified by whether the blood glucose or blood pressure measurement was missing<sup>a</sup>**

|                                    | Not missing    | Missing        |
|------------------------------------|----------------|----------------|
| n                                  | 1,320,555      | 297,804        |
| Male, no. (%)                      | 619,147 (46.9) | 227,186 (76.3) |
| Age group, no. (%)                 |                |                |
| 18-25 years                        | 253,154 (19.2) | 76,191 (25.6)  |
| 26-35 years                        | 320,018 (24.2) | 70,311 (23.6)  |
| 36-45 years                        | 281,706 (21.3) | 56,158 (18.9)  |
| 46-55 years                        | 212,465 (16.1) | 42,385 (14.2)  |
| 56-65 years                        | 150,940 (11.4) | 30,635 (10.3)  |
| >65 years                          | 102,253 (7.7)  | 22,105 (7.4)   |
| Education, no. (%)                 |                |                |
| <Primary School                    | 504,829 (38.4) | 91,186 (30.8)  |
| Primary School                     | 163,953 (12.5) | 34,474 (11.6)  |
| Middle School                      | 203,128 (15.4) | 46,764 (15.8)  |
| Secondary School                   | 182,391 (13.9) | 47,396 (16.0)  |
| High School                        | 128,270 (9.8)  | 36,654 (12.4)  |
| >High School                       | 132,544 (10.1) | 39,459 (13.3)  |
| Household wealth quintile, no. (%) |                |                |
| 1 (poorest)                        | 254,652 (20.2) | 51,072 (17.8)  |
| 2                                  | 248,101 (19.7) | 55,014 (19.2)  |
| 3                                  | 245,748 (19.5) | 57,270 (20.0)  |
| 4                                  | 253,905 (20.1) | 60,619 (21.2)  |
| 5 (richest)                        | 259,491 (20.6) | 62,408 (21.8)  |
| Currently married, no. (%)         | 988,456 (75.0) | 198,873 (67.0) |
| Urban area, no. (%)                | 429,330 (32.5) | 106,233 (35.7) |

Abbreviations: no.=number; %=Percentage.

<sup>a</sup> These numbers were not weighted using sampling weights.

**eTable 2. National diabetes and hypertension prevalence by age group and sex<sup>a,b</sup>**

|                               | <b>Diabetes</b>           |                         | <b>Hypertension</b>       |                         |
|-------------------------------|---------------------------|-------------------------|---------------------------|-------------------------|
|                               | <i>Female, % (95% CI)</i> | <i>Male, % (95% CI)</i> | <i>Female, % (95% CI)</i> | <i>Male, % (95% CI)</i> |
| <b>Age group</b>              |                           |                         |                           |                         |
| 18-25 years                   | 2.6 (2.4 - 2.7)           | 2.4 (2.2 - 2.5)         | 9.2 (8.9 - 9.6)           | 14.6 (14.2 - 15.0)      |
| 26-35 years                   | 4.0 (3.8 - 4.2)           | 4.6 (4.4 - 4.8)         | 14.2 (13.8 - 14.6)        | 21.0 (20.6 - 21.4)      |
| 36-45 years                   | 7.0 (6.8 - 7.3)           | 7.5 (7.3 - 7.8)         | 23.0 (22.6 - 23.4)        | 27.7 (27.2 - 28.2)      |
| 46-55 years                   | 11.2 (10.9 - 11.5)        | 11.3 (10.9 - 11.6)      | 32.7 (32.2 - 33.2)        | 33.7 (33.1 - 34.3)      |
| 56-65 years                   | 13.2 (12.8 - 13.6)        | 13.5 (13.1 - 14.0)      | 41.2 (40.6 - 41.9)        | 39.0 (38.3 - 39.6)      |
| >65 years                     | 13.9 (13.4 - 14.4)        | 14.0 (13.5 - 14.5)      | 48.6 (47.9 - 49.3)        | 43.4 (42.7 - 44.2)      |
| <b>Total population</b>       |                           |                         |                           |                         |
| Crude                         | 7.3 (7.1 - 7.4)           | 7.8 (7.6 - 8.0)         | 23.6 (23.3 - 23.8)        | 27.4 (27.0 - 27.7)      |
| Age-standardized <sup>2</sup> | 6.1 (6.0 - 6.3)           | 6.5 (6.4 - 6.7)         | 20.0 (19.7 - 20.3)        | 24.5 (24.2 - 24.9)      |

<sup>a</sup> The diabetes prevalence shown in this table assumes all AHS participants were fasted at the time of the blood glucose measurement. eTable3 shows national diabetes prevalence assuming all AHS participants were unfasted.

<sup>b</sup> Age-standardization was to the World Health Organization's reference population.<sup>5</sup>

**eTable 3. National diabetes prevalence assuming all AHS respondents were unfasted<sup>a</sup>**

| <b>Age group</b>                            | <b>Diabetes</b>                          |                                        |
|---------------------------------------------|------------------------------------------|----------------------------------------|
|                                             | <b>Female</b><br><i>Percent (95% CI)</i> | <b>Male</b><br><i>Percent (95% CI)</i> |
| 18-25 years                                 | 2.1 (2.0 - 2.3)                          | 1.8 (1.7 - 1.9)                        |
| 26-35 years                                 | 3.4 (3.2 - 3.5)                          | 3.7 (3.5 - 3.8)                        |
| 36-45 years                                 | 5.8 (5.5 - 6.0)                          | 6.0 (5.8 - 6.2)                        |
| 46-55 years                                 | 9.1 (8.8 - 9.5)                          | 8.9 (8.6 - 9.2)                        |
| 56-65 years                                 | 10.5 (10.2 - 10.9)                       | 10.6 (10.2 - 10.9)                     |
| >65 years                                   | 10.6 (10.2 - 11.1)                       | 10.3 (9.8 - 10.7)                      |
| <i>Total (crude)</i>                        | <i>5.9 (5.7 - 6.1)</i>                   | <i>6.1 (5.9 - 6.2)</i>                 |
| <i>Total (age-standardized<sup>1</sup>)</i> | <i>5.0 (4.8 - 5.1)</i>                   | <i>5.1 (5.0 - 5.3)</i>                 |

<sup>a</sup> Age-standardization was to the World Health Organization's reference population.<sup>5</sup>

**eFigure 2. Hypertension prevalence by five-year age group for India and WHO/NCD-RisC regions<sup>a,b,c</sup>**

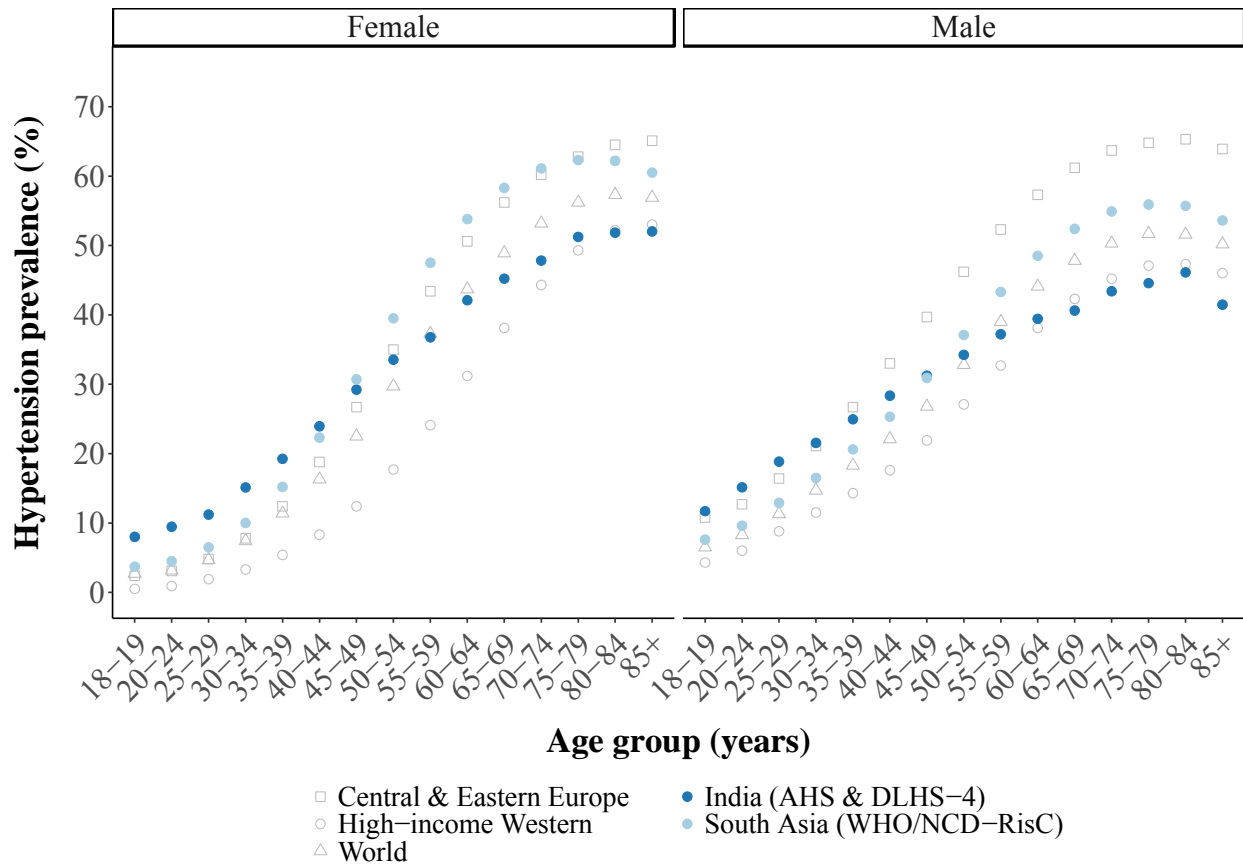

<sup>a</sup> Data for ‘South Asia’, ‘Central & Eastern Europe’, ‘High-income Western’, and ‘World’ were extracted from Zhou et al.<sup>6</sup>

<sup>b</sup> WHO/NCD-RisC estimates are for 2015.

<sup>c</sup> The countries included in each world region are listed below.

**South Asia:** Afghanistan, Bangladesh, Bhutan, India, Nepal, Pakistan

**Central and Eastern Europe**

*Central Europe:* Albania, Bosnia and Herzegovina, Bulgaria, Croatia, Czech Republic, Hungary, Macedonia (TFYR), Montenegro, Poland, Romania, Serbia, Slovakia, Slovenia

*Eastern Europe:* Belarus, Estonia, Latvia, Lithuania, Moldova, Russian Federation, Ukraine

**High-income Western countries**

*High-income English-speaking countries:* Australia, Canada, Ireland, New Zealand, United Kingdom, United States of America

*North-Western Europe:* Austria, Belgium, Denmark, Finland, Germany, Greenland, Iceland, Luxembourg, Netherlands, Norway, Sweden, Switzerland

*South-Western Europe:* Andorra, Cyprus, France, Greece, Israel, Italy, Malta, Portugal, Spain



**eFigure 3. Prevalence of diabetes by rural versus urban residence, sex, and household wealth quintile assuming all AHS respondents were unfasted**

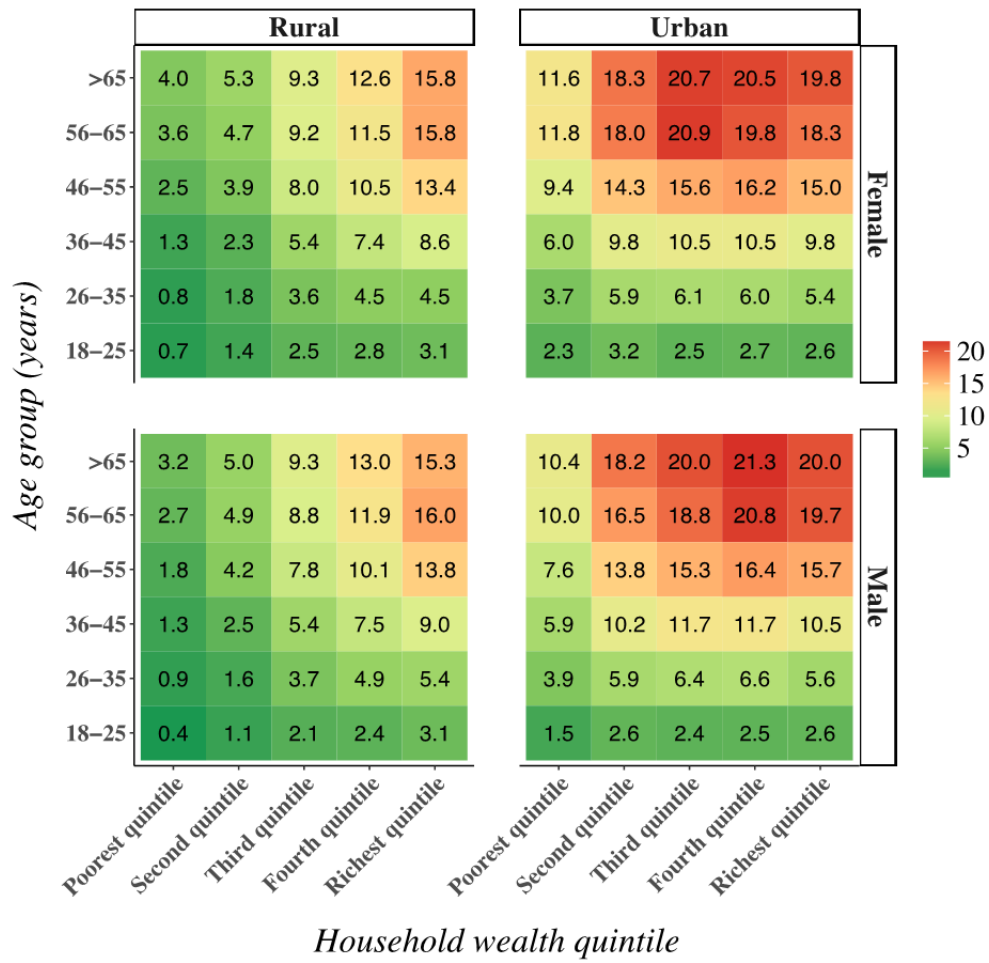

**eFigure 4. Prevalence of diabetes and hypertension by rural versus urban residence, sex, and education**

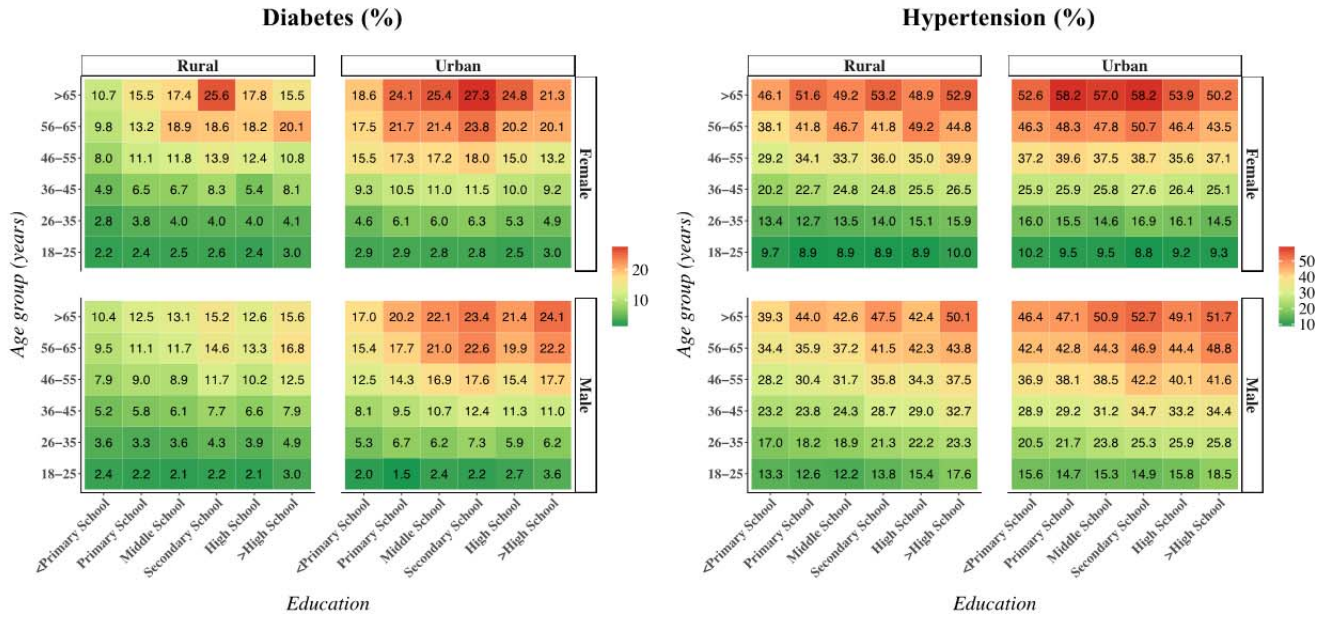

**eFigure 5. Prevalence of diabetes by rural versus urban residence, sex, and education assuming all AHS respondents were unfasted**

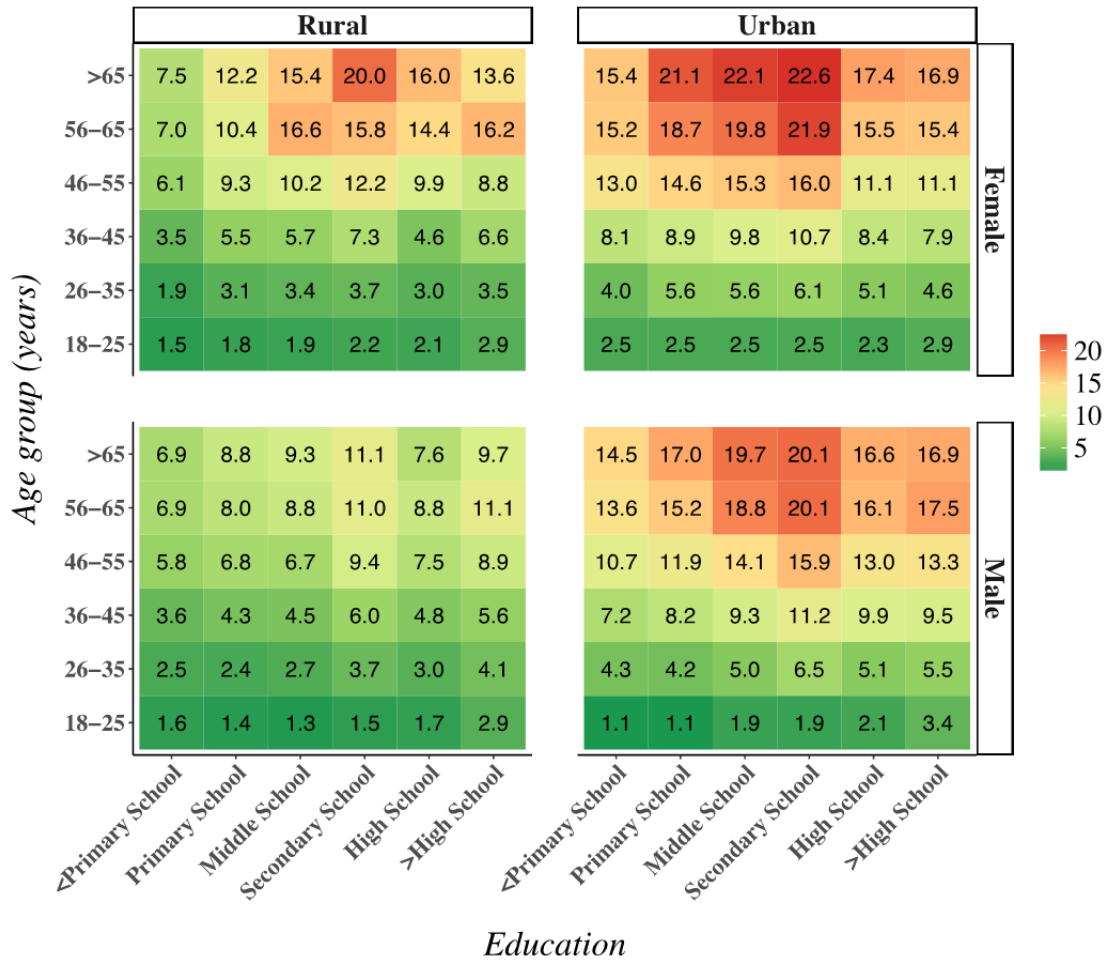

**eTable 4. Regression results for diabetes assuming all AHS participants were unfasted<sup>a,b</sup>**

| Characteristic    | Diabetes                                                  |          |                                                           |          |
|-------------------|-----------------------------------------------------------|----------|-----------------------------------------------------------|----------|
|                   | Rural                                                     |          | Urban                                                     |          |
|                   | <i>Difference in probability<sup>b</sup><br/>(95% CI)</i> | <i>P</i> | <i>Difference in probability<sup>b</sup><br/>(95% CI)</i> | <i>P</i> |
| Age group         |                                                           |          |                                                           |          |
| 18-25 years       | Ref.                                                      |          | Ref.                                                      |          |
| 26-35 years       | 1.28 (1.15 - 1.42)                                        | <0.001   | 2.54 (2.30 - 2.77)                                        | <0.001   |
| 36-45 years       | 3.14 (2.97 - 3.31)                                        | <0.001   | 6.66 (6.34 - 6.98)                                        | <0.001   |
| 46-55 years       | 5.35 (5.13 - 5.58)                                        | <0.001   | 11.12 (10.71 - 11.53)                                     | <0.001   |
| 56-65 years       | 6.81 (6.55 - 7.08)                                        | <0.001   | 14.45 (13.95 - 14.95)                                     | <0.001   |
| >65 years         | 7.50 (7.19 - 7.81)                                        | <0.001   | 15.17 (14.58 - 15.75)                                     | <0.001   |
| Wealth quintile   |                                                           |          |                                                           |          |
| 1 (poorest)       | Ref.                                                      |          | Ref.                                                      |          |
| 2                 | 0.11 (-0.01 - 0.23)                                       | <0.067   | 0.84 (0.54 - 1.14)                                        | <0.001   |
| 3                 | 0.24 (0.08 - 0.40)                                        | <0.003   | 1.88 (1.53 - 2.22)                                        | <0.001   |
| 4                 | 0.72 (0.53 - 0.90)                                        | <0.001   | 2.67 (2.29 - 3.04)                                        | <0.001   |
| 5 (richest)       | 2.32 (2.08 - 2.56)                                        | <0.001   | 3.32 (2.90 - 3.74)                                        | <0.001   |
| Education         |                                                           |          |                                                           |          |
| <Primary School   | Ref.                                                      |          | Ref.                                                      |          |
| Primary School    | 0.49 (0.34 - 0.65)                                        | <0.001   | 0.67 (0.31 - 1.03)                                        | <0.001   |
| Middle School     | 0.37 (0.22 - 0.52)                                        | <0.001   | 0.54 (0.21 - 0.87)                                        | 0.001    |
| Secondary School  | 0.18 (0.00 - 0.37)                                        | 0.050    | 0.41 (0.08 - 0.75)                                        | 0.016    |
| High School       | -0.76 (-0.96 - -0.56)                                     | 0.001    | -0.49 (-0.84 - -0.14)                                     | 0.006    |
| >High School      | -1.11 (-1.36 - -0.85)                                     | 0.001    | -1.38 (-1.74 - -1.02)                                     | <0.001   |
| Currently married | -0.26 (-0.40 - -0.13)                                     | <0.001   | 0.21 (-0.04 - 0.46)                                       | 0.197    |
| Male              | 0.25 (0.16 - 0.35)                                        | <0.001   | 0.56 (0.37 - 0.74)                                        | <0.001   |

**Abbreviations:** Coeff.=Coefficient; CI=Confidence Interval; Ref.=Reference category.

<sup>a</sup> These linear probability models included all socio-demographic variables listed in the table (age group, wealth quintile, education, marital status, and sex) and a binary indicator for each PSU (PSU-level fixed effects). Standard errors were adjusted for clustering at the PSU level.

<sup>b</sup> These regressions coefficients should be interpreted as the average absolute difference (in percentage points) in the probability of having diabetes (compared to the reference category).

**eTable 5. Regression results for diabetes among those in whom fasting status could be ascertained (i.e., DLHS-4 participants only)<sup>a,b</sup>**

| Characteristic    | Diabetes                                                  |          |                                                           |          |
|-------------------|-----------------------------------------------------------|----------|-----------------------------------------------------------|----------|
|                   | Rural                                                     |          | Urban                                                     |          |
|                   | <i>Difference in probability<sup>b</sup><br/>(95% CI)</i> | <i>P</i> | <i>Difference in probability<sup>b</sup><br/>(95% CI)</i> | <i>P</i> |
| Age group         |                                                           |          |                                                           |          |
| 18-25 years       | Ref.                                                      |          | Ref.                                                      |          |
| 26-35 years       | 1.88 (1.69 - 2.06)                                        | <0.001   | 3.19 (2.93 - 3.45)                                        | <0.001   |
| 36-45 years       | 5.22 (4.96 - 5.48)                                        | <0.001   | 8.53 (8.21 - 8.86)                                        | <0.001   |
| 46-55 years       | 8.97 (8.62 - 9.31)                                        | <0.001   | 14.13 (13.65 - 14.61)                                     | <0.001   |
| 56-65 years       | 11.55 (11.16 - 11.94)                                     | <0.001   | 18.32 (17.81 - 18.83)                                     | <0.001   |
| >65 years         | 13.08 (12.58 - 13.57)                                     | <0.001   | 19.84 (19.00 - 20.68)                                     | <0.001   |
| Wealth quintile   |                                                           |          |                                                           |          |
| 1 (poorest)       | Ref.                                                      |          | Ref.                                                      |          |
| 2                 | 0.76 (0.34 - 1.18)                                        | <0.001   | 1.61 (1.19 - 2.04)                                        | <0.001   |
| 3                 | 1.46 (1.02 - 1.91)                                        | <0.001   | 2.63 (2.16 - 3.09)                                        | <0.001   |
| 4                 | 2.68 (2.23 - 3.14)                                        | <0.001   | 2.60 (2.13 - 3.06)                                        | <0.001   |
| 5 (richest)       | 3.44 (2.93 - 3.96)                                        | <0.001   | 1.74 (1.26 - 2.22)                                        | <0.001   |
| Education         |                                                           |          |                                                           |          |
| <Primary School   | Ref.                                                      |          | Ref.                                                      |          |
| Primary School    | 0.86 (0.57 - 1.16)                                        | <0.001   | 1.06 (0.53 - 1.58)                                        | <0.001   |
| Middle School     | 0.86 (0.62 - 1.10)                                        | <0.001   | 1.13 (0.68 - 1.58)                                        | <0.001   |
| Secondary School  | 1.17 (0.86 - 1.49)                                        | <0.001   | 1.35 (0.88 - 1.83)                                        | <0.001   |
| High School       | 0.06 (-0.24 - 0.36)                                       | 0.694    | 0.22 (-0.33 - 0.77)                                       | 0.430    |
| >High School      | 1.04 (0.71 - 1.36)                                        | <0.001   | 0.50 (-0.10 - 1.10)                                       | 0.102    |
| Currently married | 0.32 (0.11 - 0.53)                                        | 0.003    | 0.64 (0.32 - 0.96)                                        | <0.001   |
| Male              | -0.06 (-0.22 - 0.10)                                      | 0.435    | 0.12 (-0.06 - 0.30)                                       | 0.183    |

**Abbreviations:** Coeff.=Coefficient; CI=Confidence Interval; Ref.=Reference category.

<sup>a</sup> These linear probability models included all socio-demographic variables listed in the table (age group, wealth quintile, education, marital status, and sex) and a binary indicator for each PSU (PSU-level fixed effects). Standard errors were adjusted for clustering at the PSU level.

<sup>b</sup> These regressions coefficients should be interpreted as the average absolute difference (in percentage points) in the probability of having diabetes (compared to the reference category).

**eFigure 6. The predicted probability of diabetes by age group, rural-urban location, and household wealth quintile assuming AHS participants were unfasted<sup>a</sup>**

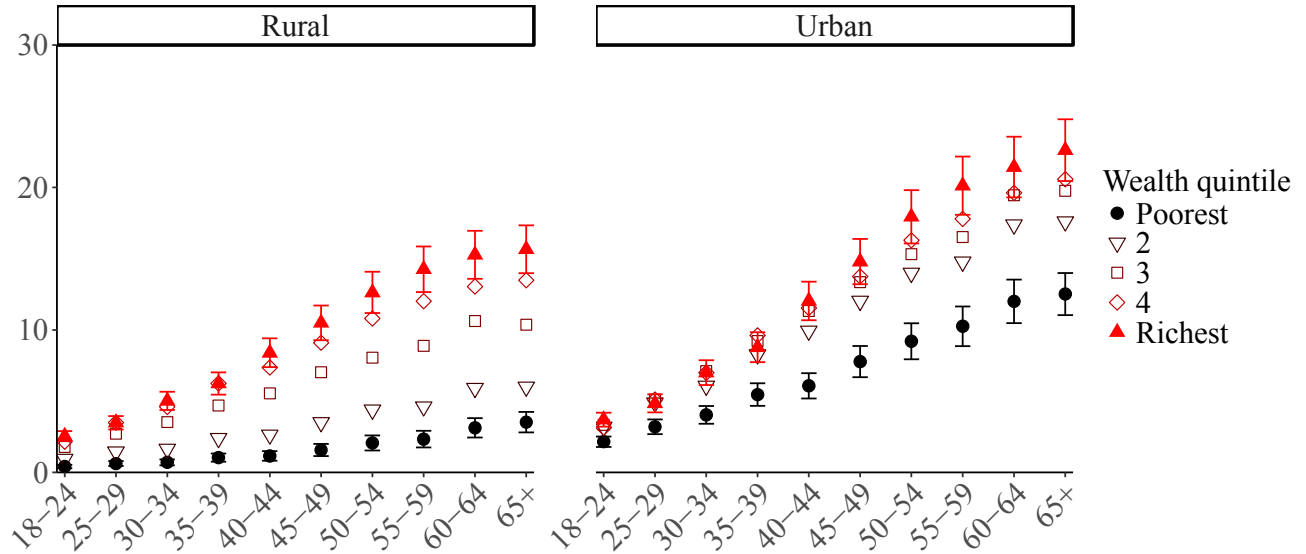

<sup>a</sup> Predicted probabilities were obtained from multivariable logistic regressions of diabetes on individuals' socio-demographic characteristics (age group, household wealth quintile, education, marital status, sex, and rural-urban location), district-level fixed effects (i.e., a binary indicator for each district), and an interaction term between age group and household wealth quintile.

**eFigure 7. The predicted probability of diabetes by age group, rural-urban location, and household wealth quintile among those in whom fasting status could be ascertained (i.e., DLHS-4 participants only)<sup>a</sup>**

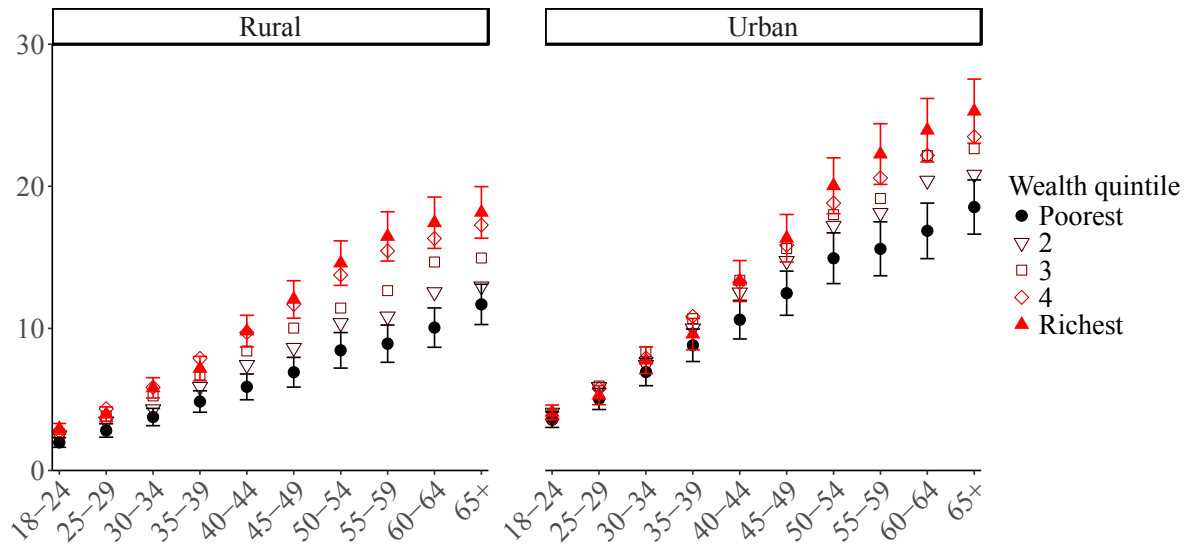

<sup>a</sup> Predicted probabilities were obtained from multivariable logistic regressions of diabetes on individuals' socio-demographic characteristics (age group, household wealth quintile, education, marital status, sex, and rural-urban location), district-level fixed effects (i.e., a binary indicator for each district), and an interaction term between age group and household wealth quintile.

**eTable 6. State-level age-standardized diabetes and hypertension prevalence estimates by sex**

| State               | Sex    | Diabetes |              |              | Hypertension |              |              |
|---------------------|--------|----------|--------------|--------------|--------------|--------------|--------------|
|                     |        | Estimate | Lower 95% CI | Upper 95% CI | Estimate     | Lower 95% CI | Upper 95% CI |
| Andaman and Nicobar | Female | 7.96     | 6.49         | 9.72         | 26.34        | 23.35        | 29.57        |
| Andaman and Nicobar | Male   | 8.57     | 6.69         | 10.92        | 37.16        | 34.18        | 40.25        |
| Andhra Pradesh      | Female | 8.90     | 8.36         | 9.48         | 20.69        | 20.01        | 21.40        |
| Andhra Pradesh      | Male   | 9.43     | 8.86         | 10.03        | 28.26        | 27.34        | 29.20        |
| Arunachal Pradesh   | Female | 4.50     | 3.47         | 5.81         | 21.42        | 19.84        | 23.10        |
| Arunachal Pradesh   | Male   | 4.33     | 3.33         | 5.61         | 27.69        | 26.39        | 29.04        |
| Assam               | Female | 3.36     | 2.93         | 3.85         | 16.82        | 15.17        | 18.62        |
| Assam               | Male   | 3.92     | 3.38         | 4.55         | 21.26        | 19.47        | 23.16        |
| Bihar               | Female | 2.39     | 2.02         | 2.82         | 20.82        | 19.37        | 22.34        |
| Bihar               | Male   | 3.06     | 2.64         | 3.53         | 20.24        | 19.00        | 21.53        |
| Chandigarh          | Female | 9.75     | 7.79         | 12.14        | 31.30        | 28.14        | 34.65        |
| Chandigarh          | Male   | 10.56    | 8.75         | 12.69        | 41.75        | 38.21        | 45.37        |
| Chhattisgarh        | Female | 3.62     | 3.08         | 4.25         | 13.50        | 12.19        | 14.93        |
| Chhattisgarh        | Male   | 5.30     | 4.49         | 6.24         | 17.12        | 15.69        | 18.64        |
| Daman and Diu       | Female | 9.71     | 7.22         | 12.95        | 36.28        | 31.77        | 41.04        |
| Daman and Diu       | Male   | 6.72     | 4.32         | 10.32        | 43.53        | 38.33        | 48.87        |
| Goa                 | Female | 16.37    | 14.20        | 18.79        | 26.37        | 22.99        | 30.04        |
| Goa                 | Male   | 17.90    | 15.37        | 20.74        | 32.90        | 29.09        | 36.95        |
| Haryana             | Female | 5.52     | 5.20         | 5.85         | 20.33        | 19.74        | 20.93        |
| Haryana             | Male   | 5.53     | 5.20         | 5.87         | 28.10        | 27.38        | 28.82        |
| Himachal Pradesh    | Female | 3.31     | 2.91         | 3.76         | 30.79        | 29.60        | 32.00        |
| Himachal Pradesh    | Male   | 3.26     | 2.83         | 3.76         | 38.53        | 37.07        | 40.02        |
| Jharkhand           | Female | 3.08     | 2.59         | 3.66         | 18.81        | 17.48        | 20.23        |
| Jharkhand           | Male   | 3.85     | 3.28         | 4.52         | 24.72        | 22.80        | 26.75        |
| Karnataka           | Female | 9.38     | 8.99         | 9.77         | 21.01        | 20.60        | 21.42        |
| Karnataka           | Male   | 10.17    | 9.74         | 10.61        | 25.45        | 24.89        | 26.02        |
| Kerala              | Female | 11.76    | 10.79        | 12.82        | 32.98        | 31.28        | 34.72        |
| Kerala              | Male   | 14.43    | 13.15        | 15.81        | 41.35        | 39.25        | 43.47        |
| Madhya Pradesh      | Female | 2.33     | 1.98         | 2.75         | 16.67        | 15.65        | 17.74        |
| Madhya Pradesh      | Male   | 2.75     | 2.25         | 3.34         | 19.87        | 18.64        | 21.15        |
| Maharashtra         | Female | 5.13     | 4.83         | 5.44         | 21.76        | 21.18        | 22.35        |
| Maharashtra         | Male   | 5.58     | 5.26         | 5.93         | 28.17        | 27.42        | 28.92        |
| Manipur             | Female | 7.39     | 6.72         | 8.14         | 17.59        | 16.52        | 18.72        |
| Manipur             | Male   | 7.94     | 7.23         | 8.70         | 25.69        | 24.27        | 27.16        |



|               |        |       |       |       |       |       |       |
|---------------|--------|-------|-------|-------|-------|-------|-------|
| Meghalaya     | Female | 2.87  | 2.28  | 3.60  | 18.27 | 16.77 | 19.89 |
| Meghalaya     | Male   | 2.97  | 2.33  | 3.77  | 22.91 | 20.91 | 25.03 |
| Mizoram       | Female | 3.45  | 3.01  | 3.95  | 14.82 | 13.97 | 15.72 |
| Mizoram       | Male   | 3.59  | 3.17  | 4.07  | 24.54 | 23.33 | 25.78 |
| Nagaland      | Female | 5.58  | 5.03  | 6.18  | 31.78 | 30.15 | 33.44 |
| Nagaland      | Male   | 6.43  | 5.80  | 7.13  | 39.59 | 37.84 | 41.37 |
| NCT of Delhi  | Female | 9.41  | 8.69  | 10.18 | 22.41 | 20.96 | 23.94 |
| NCT of Delhi  | Male   | 9.47  | 8.78  | 10.21 | 27.94 | 26.36 | 29.59 |
| Odisha        | Female | 2.87  | 2.63  | 3.13  | 15.56 | 14.47 | 16.72 |
| Odisha        | Male   | 3.65  | 3.35  | 3.97  | 17.24 | 15.93 | 18.63 |
| Puducherry    | Female | 15.50 | 14.38 | 16.68 | 17.62 | 16.58 | 18.71 |
| Puducherry    | Male   | 16.33 | 14.96 | 17.80 | 27.33 | 25.66 | 29.06 |
| Punjab        | Female | 7.23  | 6.89  | 7.59  | 29.43 | 28.82 | 30.04 |
| Punjab        | Male   | 6.79  | 6.44  | 7.16  | 41.38 | 40.61 | 42.16 |
| Rajasthan     | Female | 2.76  | 2.41  | 3.16  | 16.47 | 15.42 | 17.58 |
| Rajasthan     | Male   | 3.04  | 2.67  | 3.47  | 23.68 | 22.11 | 25.33 |
| Sikkim        | Female | 5.21  | 4.42  | 6.14  | 30.44 | 28.71 | 32.23 |
| Sikkim        | Male   | 4.99  | 4.29  | 5.79  | 36.18 | 34.09 | 38.32 |
| Tamil Nadu    | Female | 14.89 | 14.44 | 15.36 | 18.84 | 18.44 | 19.24 |
| Tamil Nadu    | Male   | 15.88 | 15.40 | 16.38 | 27.69 | 27.13 | 28.25 |
| Telangana     | Female | 7.57  | 6.86  | 8.35  | 19.62 | 18.68 | 20.59 |
| Telangana     | Male   | 8.47  | 7.66  | 9.35  | 26.52 | 25.36 | 27.72 |
| Tripura       | Female | 8.99  | 7.81  | 10.33 | 18.81 | 17.18 | 20.56 |
| Tripura       | Male   | 9.89  | 8.62  | 11.33 | 22.41 | 20.41 | 24.55 |
| Uttar Pradesh | Female | 3.16  | 2.84  | 3.52  | 18.17 | 17.11 | 19.28 |
| Uttar Pradesh | Male   | 3.41  | 3.01  | 3.86  | 20.53 | 19.14 | 21.98 |
| Uttarakhand   | Female | 3.86  | 2.78  | 5.34  | 22.28 | 19.92 | 24.83 |
| Uttarakhand   | Male   | 4.07  | 3.26  | 5.07  | 32.24 | 29.44 | 35.17 |
| West Bengal   | Female | 9.33  | 8.74  | 9.96  | 21.03 | 20.29 | 21.78 |
| West Bengal   | Male   | 9.98  | 9.36  | 10.64 | 22.62 | 21.77 | 23.49 |

**Abbreviation:** CI=Confidence interval.

**eTable 7. State-level age-standardized diabetes and hypertension prevalence estimates by rural versus urban location**

| State               | Rural or urban | Diabetes |              |              | Hypertension |              |              |
|---------------------|----------------|----------|--------------|--------------|--------------|--------------|--------------|
|                     |                | Estimate | Lower 95% CI | Upper 95% CI | Estimate     | Lower 95% CI | Upper 95% CI |
| Andaman and Nicobar | Rural          | 8.45     | 6.46         | 10.99        | 33.21        | 30.15        | 36.42        |
| Andaman and Nicobar | Urban          | 7.88     | 5.86         | 10.51        | 28.17        | 23.53        | 33.32        |
| Andhra Pradesh      | Rural          | 7.97     | 7.40         | 8.58         | 23.04        | 22.26        | 23.85        |
| Andhra Pradesh      | Urban          | 12.12    | 11.29        | 13.01        | 26.86        | 25.70        | 28.05        |
| Arunachal Pradesh   | Rural          | 3.28     | 2.85         | 3.78         | 24.76        | 23.66        | 25.89        |
| Arunachal Pradesh   | Urban          | 6.43     | 4.38         | 9.34         | 23.61        | 20.91        | 26.55        |
| Assam               | Rural          | 3.42     | 2.94         | 3.96         | 18.31        | 16.83        | 19.89        |
| Assam               | Urban          | 4.86     | 3.56         | 6.59         | 22.47        | 19.01        | 26.35        |
| Bihar               | Rural          | 2.50     | 2.13         | 2.94         | 20.17        | 18.90        | 21.50        |
| Bihar               | Urban          | 4.16     | 3.05         | 5.65         | 23.99        | 21.26        | 26.96        |
| Chandigarh          | Rural          | 11.08    | 7.08         | 16.94        | 37.09        | 34.20        | 40.07        |
| Chandigarh          | Urban          | 9.86     | 8.14         | 11.91        | 36.30        | 32.80        | 39.95        |
| Chhattisgarh        | Rural          | 3.74     | 3.16         | 4.43         | 14.66        | 13.21        | 16.24        |
| Chhattisgarh        | Urban          | 6.87     | 5.32         | 8.84         | 17.72        | 15.39        | 20.31        |
| Daman and Diu       | Rural          | 9.40     | 6.73         | 12.97        | 36.04        | 32.24        | 40.02        |
| Daman and Diu       | Urban          | 2.25     | 1.17         | 4.29         | 62.71        | 54.71        | 70.07        |
| Goa                 | Rural          | 17.39    | 15.11        | 19.93        | 31.68        | 28.56        | 34.98        |
| Goa                 | Urban          | 16.83    | 13.81        | 20.35        | 27.76        | 22.81        | 33.33        |
| Haryana             | Rural          | 5.21     | 4.86         | 5.58         | 22.66        | 21.97        | 23.36        |
| Haryana             | Urban          | 6.08     | 5.63         | 6.56         | 26.32        | 25.40        | 27.27        |
| Himachal Pradesh    | Rural          | 3.28     | 2.91         | 3.70         | 33.75        | 32.68        | 34.84        |
| Himachal Pradesh    | Urban          | 3.35     | 2.49         | 4.50         | 35.52        | 31.06        | 40.25        |
| Jharkhand           | Rural          | 2.80     | 2.30         | 3.40         | 19.95        | 18.22        | 21.80        |
| Jharkhand           | Urban          | 5.55     | 4.56         | 6.74         | 26.18        | 24.50        | 27.93        |
| Karnataka           | Rural          | 8.46     | 8.03         | 8.92         | 20.73        | 20.27        | 21.19        |
| Karnataka           | Urban          | 11.68    | 11.08        | 12.31        | 26.46        | 25.83        | 27.09        |
| Kerala              | Rural          | 11.81    | 10.28        | 13.52        | 38.81        | 36.11        | 41.58        |
| Kerala              | Urban          | 14.21    | 12.86        | 15.69        | 34.04        | 31.77        | 36.39        |
| Madhya Pradesh      | Rural          | 2.02     | 1.70         | 2.41         | 17.39        | 16.30        | 18.54        |
| Madhya Pradesh      | Urban          | 3.54     | 2.62         | 4.77         | 20.19        | 18.16        | 22.39        |
| Maharashtra         | Rural          | 4.68     | 4.33         | 5.07         | 23.51        | 22.75        | 24.28        |
| Maharashtra         | Urban          | 6.17     | 5.73         | 6.64         | 26.14        | 25.20        | 27.11        |
| Manipur             | Rural          | 7.45     | 6.74         | 8.23         | 20.42        | 19.15        | 21.74        |
| Manipur             | Urban          | 8.01     | 6.94         | 9.23         | 22.99        | 20.94        | 25.18        |

|               |       |       |       |       |       |       |       |
|---------------|-------|-------|-------|-------|-------|-------|-------|
| Meghalaya     | Rural | 2.75  | 2.14  | 3.52  | 19.25 | 17.56 | 21.08 |
| Meghalaya     | Urban | 3.48  | 2.29  | 5.24  | 22.87 | 19.75 | 26.32 |
| Mizoram       | Rural | 3.01  | 2.54  | 3.58  | 18.21 | 17.00 | 19.47 |
| Mizoram       | Urban | 3.94  | 3.39  | 4.56  | 20.63 | 19.44 | 21.88 |
| Nagaland      | Rural | 5.86  | 5.25  | 6.54  | 35.90 | 34.14 | 37.70 |
| Nagaland      | Urban | 6.29  | 5.37  | 7.36  | 34.78 | 31.78 | 37.91 |
| NCT of Delhi  | Rural | 9.86  | 8.51  | 11.40 | 23.62 | 20.34 | 27.26 |
| NCT of Delhi  | Urban | 9.35  | 8.67  | 10.07 | 25.64 | 24.08 | 27.28 |
| Odisha        | Rural | 2.94  | 2.71  | 3.18  | 15.70 | 14.46 | 17.02 |
| Odisha        | Urban | 4.98  | 4.26  | 5.81  | 20.16 | 17.67 | 22.91 |
| Puducherry    | Rural | 15.81 | 13.62 | 18.27 | 18.45 | 16.40 | 20.69 |
| Puducherry    | Urban | 15.87 | 14.70 | 17.12 | 23.09 | 22.01 | 24.21 |
| Punjab        | Rural | 6.75  | 6.36  | 7.17  | 35.46 | 34.71 | 36.23 |
| Punjab        | Urban | 7.49  | 7.00  | 8.01  | 34.38 | 33.44 | 35.34 |
| Rajasthan     | Rural | 2.43  | 2.09  | 2.83  | 18.32 | 17.31 | 19.37 |
| Rajasthan     | Urban | 4.78  | 3.96  | 5.76  | 26.05 | 22.34 | 30.13 |
| Sikkim        | Rural | 5.12  | 4.37  | 5.99  | 32.26 | 30.52 | 34.05 |
| Sikkim        | Urban | 5.07  | 3.96  | 6.48  | 35.44 | 31.98 | 39.06 |
| Tamil Nadu    | Rural | 13.28 | 12.75 | 13.83 | 21.26 | 20.74 | 21.78 |
| Tamil Nadu    | Urban | 17.50 | 16.91 | 18.10 | 24.28 | 23.71 | 24.85 |
| Telangana     | Rural | 7.41  | 6.47  | 8.48  | 21.43 | 20.28 | 22.61 |
| Telangana     | Urban | 9.01  | 8.09  | 10.01 | 25.50 | 24.01 | 27.04 |
| Tripura       | Rural | 9.20  | 7.90  | 10.68 | 18.35 | 16.64 | 20.19 |
| Tripura       | Urban | 10.00 | 7.83  | 12.70 | 26.33 | 23.02 | 29.93 |
| Uttar Pradesh | Rural | 2.85  | 2.48  | 3.28  | 18.93 | 17.56 | 20.37 |
| Uttar Pradesh | Urban | 4.59  | 3.98  | 5.30  | 20.34 | 18.44 | 22.40 |
| Uttarakhand   | Rural | 3.06  | 2.14  | 4.37  | 25.11 | 21.83 | 28.70 |
| Uttarakhand   | Urban | 6.13  | 4.50  | 8.28  | 30.34 | 27.68 | 33.13 |
| West Bengal   | Rural | 8.97  | 8.28  | 9.71  | 19.79 | 18.92 | 20.68 |
| West Bengal   | Urban | 11.16 | 10.46 | 11.90 | 26.37 | 25.45 | 27.31 |

**Abbreviation:** CI=Confidence interval.

**eTable 8. State-level crude diabetes and hypertension prevalence estimates by age group**

| State               | Age (years) | Diabetes |              |              | Hypertension |              |              |
|---------------------|-------------|----------|--------------|--------------|--------------|--------------|--------------|
|                     |             | Estimate | Lower 95% CI | Upper 95% CI | Estimate     | Lower 95% CI | Upper 95% CI |
| Andaman and Nicobar | 18-25       | 3.72     | 2.27         | 6.03         | 16.36        | 12.67        | 20.88        |
| Andaman and Nicobar | 26-35       | 5.87     | 4.15         | 8.23         | 25.19        | 22.16        | 28.48        |
| Andaman and Nicobar | 36-45       | 10.58    | 8.11         | 13.69        | 36.40        | 32.03        | 41.00        |
| Andaman and Nicobar | 46-55       | 11.80    | 9.60         | 14.42        | 44.79        | 39.85        | 49.83        |
| Andaman and Nicobar | 56-65       | 14.75    | 11.26        | 19.08        | 52.56        | 47.60        | 57.46        |
| Andaman and Nicobar | >65         | 19.13    | 14.24        | 25.21        | 65.62        | 58.86        | 71.80        |
| Andhra Pradesh      | 18-25       | 2.80     | 2.37         | 3.32         | 10.43        | 9.71         | 11.20        |
| Andhra Pradesh      | 26-35       | 5.84     | 5.28         | 6.46         | 18.43        | 17.47        | 19.42        |
| Andhra Pradesh      | 36-45       | 11.81    | 10.95        | 12.72        | 27.73        | 26.59        | 28.89        |
| Andhra Pradesh      | 46-55       | 16.01    | 14.89        | 17.19        | 38.40        | 36.98        | 39.85        |
| Andhra Pradesh      | 56-65       | 19.55    | 18.25        | 20.92        | 47.28        | 45.65        | 48.91        |
| Andhra Pradesh      | >65         | 20.20    | 18.61        | 21.90        | 52.70        | 50.59        | 54.79        |
| Arunachal Pradesh   | 18-25       | 1.82     | 1.13         | 2.93         | 14.90        | 13.56        | 16.36        |
| Arunachal Pradesh   | 26-35       | 4.30     | 3.21         | 5.75         | 21.01        | 19.37        | 22.74        |
| Arunachal Pradesh   | 36-45       | 4.76     | 3.81         | 5.94         | 29.07        | 26.71        | 31.56        |
| Arunachal Pradesh   | 46-55       | 7.26     | 5.63         | 9.32         | 38.95        | 35.63        | 42.38        |
| Arunachal Pradesh   | 56-65       | 10.82    | 5.94         | 18.91        | 40.96        | 37.59        | 44.41        |
| Arunachal Pradesh   | >65         | 8.83     | 5.39         | 14.13        | 43.78        | 39.98        | 47.65        |
| Assam               | 18-25       | 1.05     | 0.70         | 1.57         | 7.63         | 6.70         | 8.67         |
| Assam               | 26-35       | 1.98     | 1.55         | 2.52         | 13.00        | 10.73        | 15.67        |
| Assam               | 36-45       | 4.31     | 3.58         | 5.19         | 20.95        | 19.32        | 22.68        |
| Assam               | 46-55       | 6.45     | 5.44         | 7.63         | 33.18        | 29.48        | 37.10        |
| Assam               | 56-65       | 9.18     | 7.85         | 10.70        | 39.04        | 35.45        | 42.75        |
| Assam               | >65         | 12.54    | 10.99        | 14.28        | 49.18        | 46.40        | 51.97        |
| Bihar               | 18-25       | 1.14     | 0.89         | 1.45         | 11.27        | 9.95         | 12.75        |
| Bihar               | 26-35       | 1.44     | 1.15         | 1.79         | 16.75        | 15.40        | 18.19        |
| Bihar               | 36-45       | 2.98     | 2.43         | 3.64         | 24.38        | 22.56        | 26.30        |
| Bihar               | 46-55       | 4.63     | 3.85         | 5.55         | 27.56        | 25.75        | 29.44        |
| Bihar               | 56-65       | 6.58     | 5.50         | 7.86         | 33.67        | 31.55        | 35.86        |
| Bihar               | >65         | 7.06     | 5.87         | 8.48         | 39.01        | 36.72        | 41.35        |
| Chandigarh          | 18-25       | 4.14     | 2.58         | 6.58         | 20.29        | 17.11        | 23.89        |
| Chandigarh          | 26-35       | 6.09     | 3.92         | 9.35         | 31.52        | 27.70        | 35.60        |
| Chandigarh          | 36-45       | 13.32    | 10.67        | 16.51        | 44.52        | 40.17        | 48.97        |
| Chandigarh          | 46-55       | 17.76    | 14.38        | 21.72        | 52.03        | 47.20        | 56.83        |
| Chandigarh          | 56-65       | 21.72    | 16.78        | 27.63        | 57.18        | 50.32        | 63.78        |

|                  |       |       |       |       |       |       |       |
|------------------|-------|-------|-------|-------|-------|-------|-------|
| Chandigarh       | >65   | 21.91 | 15.28 | 30.40 | 61.94 | 51.86 | 71.09 |
| Chhattisgarh     | 18-25 | 2.07  | 1.60  | 2.68  | 7.77  | 6.67  | 9.03  |
| Chhattisgarh     | 26-35 | 2.84  | 2.27  | 3.53  | 10.34 | 9.28  | 11.52 |
| Chhattisgarh     | 36-45 | 4.90  | 4.02  | 5.95  | 17.65 | 15.99 | 19.44 |
| Chhattisgarh     | 46-55 | 7.81  | 6.48  | 9.37  | 24.83 | 22.42 | 27.41 |
| Chhattisgarh     | 56-65 | 11.53 | 9.43  | 14.03 | 33.10 | 29.80 | 36.57 |
| Chhattisgarh     | >65   | 10.95 | 8.96  | 13.33 | 38.20 | 35.10 | 41.40 |
| Daman and Diu    | 18-25 | 3.79  | 2.30  | 6.16  | 30.46 | 25.19 | 36.30 |
| Daman and Diu    | 26-35 | 7.33  | 3.64  | 14.23 | 33.10 | 28.49 | 38.06 |
| Daman and Diu    | 36-45 | 10.63 | 7.14  | 15.53 | 45.11 | 39.12 | 51.24 |
| Daman and Diu    | 46-55 | 16.59 | 11.39 | 23.53 | 51.61 | 44.41 | 58.74 |
| Daman and Diu    | 56-65 | 18.18 | 11.80 | 26.98 | 64.50 | 56.47 | 71.78 |
| Daman and Diu    | >65   | 17.26 | 9.49  | 29.35 | 57.15 | 47.62 | 66.17 |
| Goa              | 18-25 | 8.17  | 5.60  | 11.78 | 15.31 | 11.29 | 20.43 |
| Goa              | 26-35 | 12.77 | 10.35 | 15.65 | 22.68 | 18.75 | 27.16 |
| Goa              | 36-45 | 17.38 | 14.19 | 21.10 | 32.08 | 27.12 | 37.47 |
| Goa              | 46-55 | 25.10 | 21.31 | 29.30 | 40.33 | 36.01 | 44.81 |
| Goa              | 56-65 | 26.21 | 22.35 | 30.48 | 45.74 | 40.96 | 50.59 |
| Goa              | >65   | 41.02 | 35.72 | 46.53 | 51.06 | 45.42 | 56.66 |
| Haryana          | 18-25 | 2.84  | 2.55  | 3.16  | 15.49 | 14.75 | 16.25 |
| Haryana          | 26-35 | 4.40  | 4.02  | 4.80  | 20.43 | 19.67 | 21.20 |
| Haryana          | 36-45 | 6.37  | 5.92  | 6.86  | 27.97 | 27.08 | 28.88 |
| Haryana          | 46-55 | 9.32  | 8.67  | 10.01 | 34.50 | 33.44 | 35.58 |
| Haryana          | 56-65 | 11.15 | 10.41 | 11.93 | 40.44 | 39.23 | 41.67 |
| Haryana          | >65   | 11.78 | 10.83 | 12.79 | 47.68 | 46.22 | 49.15 |
| Himachal Pradesh | 18-25 | 0.90  | 0.58  | 1.41  | 23.13 | 21.33 | 25.04 |
| Himachal Pradesh | 26-35 | 1.74  | 1.32  | 2.28  | 27.59 | 26.04 | 29.19 |
| Himachal Pradesh | 36-45 | 3.11  | 2.57  | 3.76  | 35.65 | 33.91 | 37.44 |
| Himachal Pradesh | 46-55 | 5.71  | 4.87  | 6.67  | 42.40 | 40.41 | 44.41 |
| Himachal Pradesh | 56-65 | 6.85  | 5.87  | 7.99  | 49.15 | 46.64 | 51.67 |
| Himachal Pradesh | >65   | 8.45  | 7.10  | 10.04 | 52.81 | 49.92 | 55.68 |
| Jharkhand        | 18-25 | 0.55  | 0.33  | 0.90  | 10.82 | 9.27  | 12.58 |
| Jharkhand        | 26-35 | 1.63  | 1.21  | 2.19  | 15.33 | 13.72 | 17.09 |
| Jharkhand        | 36-45 | 4.14  | 3.43  | 4.99  | 24.34 | 22.62 | 26.15 |
| Jharkhand        | 46-55 | 7.47  | 6.33  | 8.80  | 34.43 | 32.20 | 36.73 |
| Jharkhand        | 56-65 | 9.82  | 8.09  | 11.86 | 43.79 | 40.98 | 46.63 |
| Jharkhand        | >65   | 9.82  | 8.15  | 11.80 | 49.53 | 46.59 | 52.49 |
| Karnataka        | 18-25 | 4.09  | 3.76  | 4.44  | 9.61  | 9.17  | 10.07 |
| Karnataka        | 26-35 | 6.50  | 6.12  | 6.90  | 16.94 | 16.39 | 17.51 |

|                |       |       |       |       |       |       |       |
|----------------|-------|-------|-------|-------|-------|-------|-------|
| Karnataka      | 36-45 | 11.93 | 11.36 | 12.53 | 27.87 | 27.18 | 28.58 |
| Karnataka      | 46-55 | 17.12 | 16.35 | 17.92 | 38.15 | 37.26 | 39.05 |
| Karnataka      | 56-65 | 19.76 | 18.83 | 20.73 | 46.10 | 45.05 | 47.15 |
| Karnataka      | >65   | 21.40 | 20.32 | 22.52 | 52.63 | 51.44 | 53.83 |
| Kerala         | 18-25 | 5.71  | 4.55  | 7.14  | 21.79 | 19.48 | 24.29 |
| Kerala         | 26-35 | 8.83  | 7.53  | 10.33 | 30.68 | 28.17 | 33.31 |
| Kerala         | 36-45 | 12.95 | 11.69 | 14.33 | 39.18 | 36.56 | 41.87 |
| Kerala         | 46-55 | 18.73 | 17.36 | 20.19 | 46.27 | 44.21 | 48.34 |
| Kerala         | 56-65 | 24.51 | 22.82 | 26.28 | 51.87 | 50.11 | 53.62 |
| Kerala         | >65   | 24.51 | 22.77 | 26.34 | 57.68 | 55.84 | 59.49 |
| Madhya Pradesh | 18-25 | 0.92  | 0.69  | 1.22  | 11.01 | 9.74  | 12.42 |
| Madhya Pradesh | 26-35 | 1.68  | 1.10  | 2.55  | 14.79 | 13.51 | 16.17 |
| Madhya Pradesh | 36-45 | 2.67  | 2.31  | 3.08  | 19.54 | 18.30 | 20.84 |
| Madhya Pradesh | 46-55 | 4.79  | 3.73  | 6.14  | 27.78 | 26.07 | 29.56 |
| Madhya Pradesh | 56-65 | 6.59  | 5.59  | 7.76  | 35.28 | 33.44 | 37.17 |
| Madhya Pradesh | >65   | 7.87  | 6.76  | 9.16  | 40.99 | 38.68 | 43.35 |
| Maharashtra    | 18-25 | 2.20  | 1.96  | 2.47  | 15.14 | 14.36 | 15.96 |
| Maharashtra    | 26-35 | 3.84  | 3.52  | 4.18  | 20.29 | 19.56 | 21.05 |
| Maharashtra    | 36-45 | 5.84  | 5.43  | 6.27  | 27.61 | 26.81 | 28.43 |
| Maharashtra    | 46-55 | 9.13  | 8.55  | 9.74  | 34.86 | 33.90 | 35.83 |
| Maharashtra    | 56-65 | 11.32 | 10.65 | 12.03 | 40.40 | 39.41 | 41.41 |
| Maharashtra    | >65   | 11.49 | 10.73 | 12.31 | 45.08 | 43.94 | 46.22 |
| Manipur        | 18-25 | 2.92  | 2.32  | 3.67  | 10.40 | 9.21  | 11.73 |
| Manipur        | 26-35 | 5.10  | 4.43  | 5.87  | 14.88 | 13.77 | 16.05 |
| Manipur        | 36-45 | 8.61  | 7.64  | 9.69  | 24.98 | 23.12 | 26.93 |
| Manipur        | 46-55 | 11.93 | 10.61 | 13.38 | 33.08 | 30.77 | 35.47 |
| Manipur        | 56-65 | 15.95 | 14.32 | 17.73 | 36.81 | 34.34 | 39.35 |
| Manipur        | >65   | 20.04 | 17.91 | 22.37 | 42.52 | 39.55 | 45.56 |
| Meghalaya      | 18-25 | 1.65  | 1.15  | 2.35  | 12.91 | 11.36 | 14.64 |
| Meghalaya      | 26-35 | 1.86  | 1.32  | 2.61  | 16.21 | 14.50 | 18.08 |
| Meghalaya      | 36-45 | 3.01  | 2.22  | 4.07  | 24.12 | 21.49 | 26.96 |
| Meghalaya      | 46-55 | 6.68  | 5.24  | 8.49  | 31.28 | 28.67 | 34.01 |
| Meghalaya      | 56-65 | 6.82  | 5.22  | 8.87  | 38.30 | 34.00 | 42.79 |
| Meghalaya      | >65   | 7.49  | 5.27  | 10.55 | 49.94 | 44.70 | 55.18 |
| Mizoram        | 18-25 | 1.41  | 1.07  | 1.85  | 12.68 | 11.51 | 13.95 |
| Mizoram        | 26-35 | 2.39  | 1.98  | 2.87  | 17.94 | 16.74 | 19.21 |
| Mizoram        | 36-45 | 4.24  | 3.52  | 5.11  | 21.32 | 19.83 | 22.88 |
| Mizoram        | 46-55 | 6.32  | 5.38  | 7.41  | 27.15 | 25.37 | 29.01 |
| Mizoram        | 56-65 | 7.33  | 6.08  | 8.80  | 30.37 | 28.05 | 32.79 |

|              |       |       |       |       |       |       |       |
|--------------|-------|-------|-------|-------|-------|-------|-------|
| Mizoram      | >65   | 12.51 | 10.58 | 14.74 | 38.19 | 35.55 | 40.90 |
| Nagaland     | 18-25 | 2.78  | 2.15  | 3.59  | 16.04 | 14.39 | 17.83 |
| Nagaland     | 26-35 | 4.33  | 3.63  | 5.16  | 26.54 | 24.74 | 28.41 |
| Nagaland     | 36-45 | 6.63  | 5.79  | 7.59  | 39.93 | 37.78 | 42.12 |
| Nagaland     | 46-55 | 8.37  | 7.37  | 9.48  | 48.43 | 46.24 | 50.63 |
| Nagaland     | 56-65 | 9.63  | 8.40  | 11.02 | 56.45 | 53.98 | 58.89 |
| Nagaland     | >65   | 11.48 | 9.99  | 13.16 | 62.25 | 59.73 | 64.71 |
| NCT of Delhi | 18-25 | 3.81  | 3.26  | 4.45  | 17.15 | 15.36 | 19.11 |
| NCT of Delhi | 26-35 | 7.33  | 6.54  | 8.21  | 22.35 | 20.66 | 24.12 |
| NCT of Delhi | 36-45 | 13.23 | 12.06 | 14.50 | 29.59 | 27.76 | 31.48 |
| NCT of Delhi | 46-55 | 16.32 | 14.86 | 17.89 | 35.87 | 33.76 | 38.04 |
| NCT of Delhi | 56-65 | 19.44 | 17.40 | 21.67 | 42.00 | 39.49 | 44.56 |
| NCT of Delhi | >65   | 23.70 | 20.26 | 27.52 | 47.32 | 43.37 | 51.31 |
| Odisha       | 18-25 | 0.54  | 0.39  | 0.76  | 6.51  | 5.60  | 7.55  |
| Odisha       | 26-35 | 1.36  | 1.16  | 1.61  | 10.46 | 9.34  | 11.69 |
| Odisha       | 36-45 | 3.25  | 2.91  | 3.63  | 17.16 | 15.74 | 18.67 |
| Odisha       | 46-55 | 6.70  | 6.04  | 7.42  | 25.67 | 23.94 | 27.49 |
| Odisha       | 56-65 | 8.40  | 7.58  | 9.30  | 34.47 | 32.63 | 36.36 |
| Odisha       | >65   | 8.83  | 8.00  | 9.73  | 42.25 | 40.44 | 44.09 |
| Puducherry   | 18-25 | 4.17  | 3.33  | 5.20  | 8.38  | 7.11  | 9.86  |
| Puducherry   | 26-35 | 10.98 | 9.66  | 12.45 | 13.41 | 11.98 | 14.98 |
| Puducherry   | 36-45 | 19.03 | 17.25 | 20.94 | 24.94 | 23.06 | 26.92 |
| Puducherry   | 46-55 | 25.62 | 23.49 | 27.86 | 33.26 | 31.28 | 35.31 |
| Puducherry   | 56-65 | 32.05 | 29.35 | 34.88 | 45.76 | 43.05 | 48.50 |
| Puducherry   | >65   | 32.87 | 29.65 | 36.25 | 53.32 | 49.78 | 56.82 |
| Punjab       | 18-25 | 2.62  | 2.36  | 2.90  | 19.80 | 19.04 | 20.57 |
| Punjab       | 26-35 | 4.73  | 4.36  | 5.13  | 29.13 | 28.32 | 29.96 |
| Punjab       | 36-45 | 8.18  | 7.68  | 8.71  | 42.00 | 41.06 | 42.95 |
| Punjab       | 46-55 | 13.01 | 12.30 | 13.75 | 52.64 | 51.61 | 53.66 |
| Punjab       | 56-65 | 16.40 | 15.55 | 17.29 | 59.68 | 58.57 | 60.77 |
| Punjab       | >65   | 17.80 | 16.73 | 18.93 | 64.64 | 63.34 | 65.91 |
| Rajasthan    | 18-25 | 1.19  | 0.93  | 1.53  | 10.15 | 9.02  | 11.39 |
| Rajasthan    | 26-35 | 1.66  | 1.33  | 2.07  | 14.83 | 13.78 | 15.94 |
| Rajasthan    | 36-45 | 3.09  | 2.63  | 3.63  | 21.96 | 20.36 | 23.64 |
| Rajasthan    | 46-55 | 5.17  | 4.51  | 5.92  | 30.52 | 28.78 | 32.33 |
| Rajasthan    | 56-65 | 7.36  | 6.41  | 8.42  | 40.32 | 37.90 | 42.80 |
| Rajasthan    | >65   | 8.55  | 7.45  | 9.80  | 47.25 | 44.91 | 49.60 |
| Sikkim       | 18-25 | 2.62  | 1.87  | 3.65  | 17.13 | 15.17 | 19.28 |
| Sikkim       | 26-35 | 3.10  | 2.47  | 3.89  | 29.13 | 26.70 | 31.69 |

|               |       |       |       |       |       |       |       |
|---------------|-------|-------|-------|-------|-------|-------|-------|
| Sikkim        | 36-45 | 6.43  | 5.20  | 7.94  | 39.39 | 36.73 | 42.12 |
| Sikkim        | 46-55 | 9.11  | 7.51  | 11.01 | 54.28 | 50.54 | 57.98 |
| Sikkim        | 56-65 | 12.76 | 10.52 | 15.40 | 52.34 | 48.15 | 56.50 |
| Sikkim        | >65   | 10.83 | 8.44  | 13.79 | 56.32 | 52.01 | 60.54 |
| Tamil Nadu    | 18-25 | 5.20  | 4.78  | 5.65  | 9.58  | 9.09  | 10.10 |
| Tamil Nadu    | 26-35 | 10.59 | 10.09 | 11.12 | 16.53 | 15.97 | 17.10 |
| Tamil Nadu    | 36-45 | 18.14 | 17.49 | 18.79 | 25.19 | 24.53 | 25.88 |
| Tamil Nadu    | 46-55 | 25.41 | 24.59 | 26.25 | 35.22 | 34.40 | 36.05 |
| Tamil Nadu    | 56-65 | 29.48 | 28.50 | 30.48 | 43.89 | 42.89 | 44.89 |
| Tamil Nadu    | >65   | 29.60 | 28.43 | 30.80 | 49.64 | 48.40 | 50.87 |
| Telangana     | 18-25 | 3.83  | 2.97  | 4.92  | 12.87 | 11.67 | 14.17 |
| Telangana     | 26-35 | 5.91  | 5.12  | 6.80  | 19.31 | 18.22 | 20.45 |
| Telangana     | 36-45 | 9.64  | 8.69  | 10.67 | 28.15 | 26.62 | 29.72 |
| Telangana     | 46-55 | 14.39 | 13.02 | 15.88 | 33.76 | 31.88 | 35.70 |
| Telangana     | 56-65 | 15.22 | 13.76 | 16.80 | 39.58 | 37.50 | 41.71 |
| Telangana     | >65   | 17.55 | 15.56 | 19.73 | 44.65 | 41.60 | 47.74 |
| Tripura       | 18-25 | 4.24  | 3.27  | 5.48  | 11.57 | 9.89  | 13.49 |
| Tripura       | 26-35 | 6.69  | 5.42  | 8.25  | 17.42 | 15.43 | 19.62 |
| Tripura       | 36-45 | 11.52 | 9.71  | 13.60 | 23.38 | 21.09 | 25.84 |
| Tripura       | 46-55 | 16.46 | 14.15 | 19.07 | 30.23 | 27.24 | 33.40 |
| Tripura       | 56-65 | 19.27 | 16.46 | 22.43 | 36.11 | 31.94 | 40.50 |
| Tripura       | >65   | 24.51 | 20.70 | 28.77 | 46.95 | 43.11 | 50.83 |
| Uttar Pradesh | 18-25 | 1.21  | 0.94  | 1.56  | 11.88 | 10.63 | 13.25 |
| Uttar Pradesh | 26-35 | 1.91  | 1.60  | 2.27  | 15.11 | 13.79 | 16.53 |
| Uttar Pradesh | 36-45 | 3.55  | 3.09  | 4.07  | 22.20 | 20.79 | 23.69 |
| Uttar Pradesh | 46-55 | 6.73  | 5.97  | 7.58  | 27.53 | 25.91 | 29.21 |
| Uttar Pradesh | 56-65 | 7.26  | 6.43  | 8.20  | 32.38 | 30.50 | 34.32 |
| Uttar Pradesh | >65   | 7.84  | 6.97  | 8.81  | 37.63 | 35.57 | 39.73 |
| Uttarakhand   | 18-25 | 1.11  | 0.44  | 2.78  | 13.01 | 10.42 | 16.14 |
| Uttarakhand   | 26-35 | 1.47  | 0.84  | 2.56  | 20.60 | 17.84 | 23.67 |
| Uttarakhand   | 36-45 | 4.72  | 3.51  | 6.30  | 29.24 | 26.30 | 32.36 |
| Uttarakhand   | 46-55 | 6.43  | 4.93  | 8.35  | 40.29 | 36.21 | 44.51 |
| Uttarakhand   | 56-65 | 12.19 | 9.76  | 15.13 | 48.48 | 43.98 | 53.01 |
| Uttarakhand   | >65   | 10.91 | 8.37  | 14.10 | 54.20 | 49.81 | 58.52 |
| West Bengal   | 18-25 | 4.70  | 4.17  | 5.29  | 9.58  | 8.87  | 10.33 |
| West Bengal   | 26-35 | 7.58  | 6.92  | 8.30  | 16.24 | 15.34 | 17.17 |
| West Bengal   | 36-45 | 11.11 | 10.35 | 11.91 | 25.54 | 24.43 | 26.68 |
| West Bengal   | 46-55 | 15.47 | 14.36 | 16.65 | 34.76 | 33.45 | 36.10 |
| West Bengal   | 56-65 | 17.06 | 15.87 | 18.31 | 42.98 | 41.35 | 44.62 |



|             |     |       |       |       |       |       |       |
|-------------|-----|-------|-------|-------|-------|-------|-------|
| West Bengal | >65 | 20.26 | 18.72 | 21.88 | 51.22 | 49.23 | 53.20 |
|-------------|-----|-------|-------|-------|-------|-------|-------|

**eTable 9. State-level age-standardized diabetes prevalence estimates by sex assuming all AHS respondents were unfasted**

| State          | Sex    | Diabetes |              |              |
|----------------|--------|----------|--------------|--------------|
|                |        | Estimate | Lower 95% CI | Upper 95% CI |
| Assam          | Female | 0.47     | 0.35         | 0.63         |
| Assam          | Male   | 0.50     | 0.36         | 0.68         |
| Bihar          | Female | 0.25     | 0.19         | 0.34         |
| Bihar          | Male   | 0.38     | 0.28         | 0.50         |
| Chhattisgarh   | Female | 0.21     | 0.14         | 0.31         |
| Chhattisgarh   | Male   | 0.47     | 0.33         | 0.65         |
| Jharkhand      | Female | 0.82     | 0.62         | 1.07         |
| Jharkhand      | Male   | 1.16     | 0.90         | 1.50         |
| Madhya Pradesh | Female | 0.34     | 0.28         | 0.42         |
| Madhya Pradesh | Male   | 0.47     | 0.36         | 0.63         |
| Odisha         | Female | 0.70     | 0.61         | 0.80         |
| Odisha         | Male   | 0.87     | 0.74         | 1.01         |
| Rajasthan      | Female | 0.40     | 0.33         | 0.48         |
| Rajasthan      | Male   | 0.37     | 0.30         | 0.45         |
| Uttar Pradesh  | Female | 0.69     | 0.59         | 0.80         |
| Uttar Pradesh  | Male   | 0.65     | 0.54         | 0.78         |
| Uttarakhand    | Female | 1.03     | 0.74         | 1.43         |
| Uttarakhand    | Male   | 0.96     | 0.68         | 1.35         |

**Abbreviation:** CI=Confidence interval.

**eTable 10. State-level age-standardized diabetes prevalence estimates by rural versus urban location assuming all AHS respondents were unfasted**

| State          | Rural or urban | Diabetes |              |              |
|----------------|----------------|----------|--------------|--------------|
|                |                | Estimate | Lower 95% CI | Upper 95% CI |
| Assam          | Rural          | 0.42     | 0.31         | 0.57         |
| Assam          | Urban          | 0.86     | 0.52         | 1.44         |
| Bihar          | Rural          | 0.27     | 0.21         | 0.36         |
| Bihar          | Urban          | 0.58     | 0.35         | 0.96         |
| Chhattisgarh   | Rural          | 0.26     | 0.17         | 0.40         |
| Chhattisgarh   | Urban          | 0.62     | 0.45         | 0.86         |
| Jharkhand      | Rural          | 0.67     | 0.52         | 0.87         |
| Jharkhand      | Urban          | 1.99     | 1.40         | 2.84         |
| Madhya Pradesh | Rural          | 0.26     | 0.21         | 0.33         |
| Madhya Pradesh | Urban          | 0.69     | 0.51         | 0.92         |
| Odisha         | Rural          | 0.65     | 0.57         | 0.73         |
| Odisha         | Urban          | 1.57     | 1.24         | 1.98         |
| Rajasthan      | Rural          | 0.28     | 0.23         | 0.34         |
| Rajasthan      | Urban          | 0.80     | 0.63         | 1.00         |
| Uttar Pradesh  | Rural          | 0.48     | 0.41         | 0.57         |
| Uttar Pradesh  | Urban          | 1.24     | 1.02         | 1.50         |
| Uttarakhand    | Rural          | 0.76     | 0.53         | 1.09         |
| Uttarakhand    | Urban          | 1.57     | 1.02         | 2.43         |

**Abbreviation:** CI=Confidence interval

**eTable 11. State-level crude diabetes prevalence estimates by age group assuming all AHS respondents were unfasted**

| State          | Age (years) | Diabetes |              |              |
|----------------|-------------|----------|--------------|--------------|
|                |             | Estimate | Lower 95% CI | Upper 95% CI |
| Assam          | 18-25       | 0.05     | 0.02         | 0.12         |
| Assam          | 26-35       | 0.17     | 0.07         | 0.40         |
| Assam          | 36-45       | 0.61     | 0.42         | 0.88         |
| Assam          | 46-55       | 0.87     | 0.62         | 1.22         |
| Assam          | 56-65       | 1.67     | 1.27         | 2.20         |
| Assam          | >65         | 1.73     | 1.20         | 2.48         |
| Bihar          | 18-25       | 0.03     | 0.01         | 0.13         |
| Bihar          | 26-35       | 0.08     | 0.04         | 0.15         |
| Bihar          | 36-45       | 0.35     | 0.25         | 0.51         |
| Bihar          | 46-55       | 0.69     | 0.48         | 0.99         |
| Bihar          | 56-65       | 1.02     | 0.74         | 1.41         |
| Bihar          | >65         | 1.04     | 0.73         | 1.50         |
| Chhattisgarh   | 18-25       | 0.09     | 0.03         | 0.26         |
| Chhattisgarh   | 26-35       | 0.13     | 0.07         | 0.26         |
| Chhattisgarh   | 36-45       | 0.23     | 0.13         | 0.40         |
| Chhattisgarh   | 46-55       | 0.95     | 0.61         | 1.47         |
| Chhattisgarh   | 56-65       | 1.28     | 0.77         | 2.12         |
| Chhattisgarh   | >65         | 0.94     | 0.54         | 1.64         |
| Jharkhand      | 18-25       | 0.06     | 0.02         | 0.25         |
| Jharkhand      | 26-35       | 0.40     | 0.21         | 0.74         |
| Jharkhand      | 36-45       | 1.06     | 0.75         | 1.50         |
| Jharkhand      | 46-55       | 2.44     | 1.80         | 3.31         |
| Jharkhand      | 56-65       | 3.18     | 2.34         | 4.30         |
| Jharkhand      | >65         | 2.44     | 1.73         | 3.45         |
| Madhya Pradesh | 18-25       | 0.12     | 0.07         | 0.21         |
| Madhya Pradesh | 26-35       | 0.16     | 0.11         | 0.23         |
| Madhya Pradesh | 36-45       | 0.46     | 0.35         | 0.62         |
| Madhya Pradesh | 46-55       | 0.78     | 0.60         | 1.03         |
| Madhya Pradesh | 56-65       | 1.59     | 0.91         | 2.75         |
| Madhya Pradesh | >65         | 0.89     | 0.65         | 1.22         |
| Odisha         | 18-25       | 0.09     | 0.04         | 0.19         |
| Odisha         | 26-35       | 0.25     | 0.18         | 0.35         |
| Odisha         | 36-45       | 0.94     | 0.77         | 1.17         |
| Odisha         | 46-55       | 1.82     | 1.53         | 2.16         |

|               |       |      |      |      |
|---------------|-------|------|------|------|
| Odisha        | 56-65 | 1.82 | 1.52 | 2.17 |
| Odisha        | >65   | 1.38 | 1.09 | 1.74 |
| Rajasthan     | 18-25 | 0.03 | 0.01 | 0.09 |
| Rajasthan     | 26-35 | 0.14 | 0.08 | 0.24 |
| Rajasthan     | 36-45 | 0.36 | 0.26 | 0.50 |
| Rajasthan     | 46-55 | 1.05 | 0.80 | 1.37 |
| Rajasthan     | 56-65 | 1.17 | 0.91 | 1.50 |
| Rajasthan     | >65   | 1.53 | 1.09 | 2.14 |
| Uttar Pradesh | 18-25 | 0.08 | 0.04 | 0.14 |
| Uttar Pradesh | 26-35 | 0.18 | 0.12 | 0.26 |
| Uttar Pradesh | 36-45 | 0.82 | 0.64 | 1.04 |
| Uttar Pradesh | 46-55 | 1.75 | 1.43 | 2.14 |
| Uttar Pradesh | 56-65 | 1.96 | 1.57 | 2.43 |
| Uttar Pradesh | >65   | 1.29 | 1.00 | 1.67 |
| Uttarakhand   | 18-25 | 0.25 | 0.04 | 1.38 |
| Uttarakhand   | 26-35 | 0.16 | 0.05 | 0.52 |
| Uttarakhand   | 36-45 | 1.09 | 0.65 | 1.82 |
| Uttarakhand   | 46-55 | 1.70 | 1.08 | 2.66 |
| Uttarakhand   | 56-65 | 3.98 | 2.78 | 5.69 |
| Uttarakhand   | >65   | 2.91 | 1.99 | 4.25 |

**eFigure 8. Association of the state- and district-level age-standardized prevalence of diabetes with mean household wealth quintile<sup>a,b</sup>**

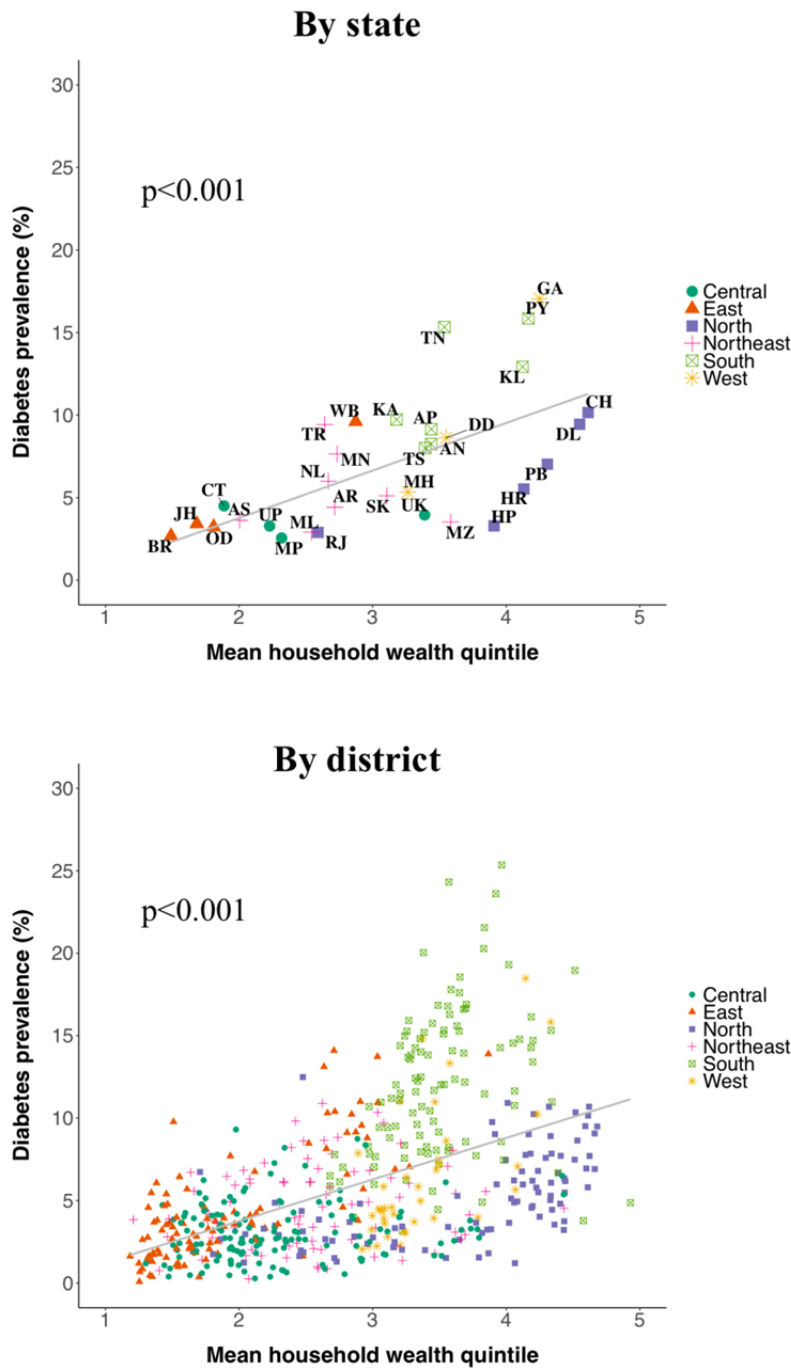

<sup>a</sup> p-values refer to the statistical significance of the linear (ordinary least squares) regression line (shown in grey).

<sup>b</sup> States and districts were divided into regions as per their allocation to Zonal Councils by the Government of India.<sup>7</sup>

*Abbreviations:* AP, Andhra Pradesh; AR, Arunachal Pradesh; AS, Assam; BR, Bihar; CH, Chandigarh; CT, Chhattisgarh; DD, Daman and Diu; DL, Delhi; GA, Goa; GJ, Gujarat; HR, Haryana; HP, Himachal Pradesh; JK, Jammu & Kashmir; JH, Jharkhand; KA, Karnataka; KL, Kerala; MP, Madhya Pradesh; MH, Maharashtra; MN, Manipur; ML, Meghalaya; MZ, Mizoram; NL, Nagaland; OD, Odisha (Orissa); PB, Punjab; PY, Puducherry; RJ,

Rajasthan; SK, Sikkim; TN, Tamil Nadu; TS, Telangana State; TR, Tripura; UP, Uttar Pradesh; UK, Uttarakhand (Uttaranchal); WB, West Bengal.

**eFigure 9. Association of the state- and district-level age-standardized prevalence of hypertension with mean household wealth quintile<sup>a,b</sup>**

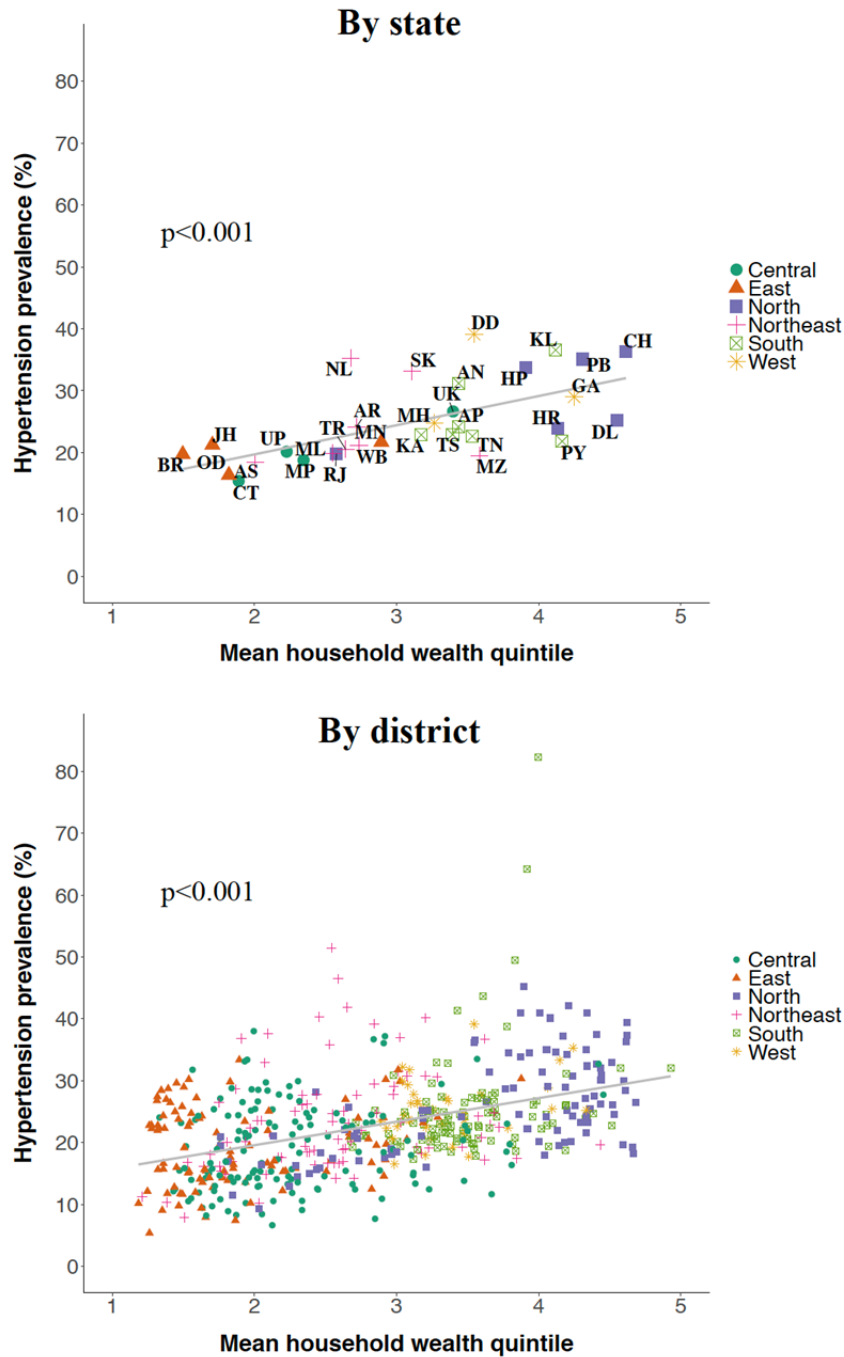

<sup>a</sup> p-values refer to the statistical significance of the linear (ordinary least squares) regression line (shown in grey).

<sup>b</sup> States and districts were divided into regions as per their allocation to Zonal Councils by the Government of India.<sup>7</sup>

*Abbreviations:* AP, Andhra Pradesh; AR, Arunachal Pradesh; AS, Assam; BR, Bihar; CH, Chandigarh; CT, Chhattisgarh; DD, Daman and Diu; DL, Delhi; GA, Goa; GJ, Gujarat; HR, Haryana; HP, Himachal Pradesh; JK, Jammu & Kashmir; JH, Jharkhand; KA, Karnataka; KL, Kerala; MP, Madhya Pradesh; MH, Maharashtra; MN, Manipur; ML, Meghalaya; MZ, Mizoram; NL, Nagaland; OD, Odisha (Orissa); PB, Punjab; PY, Puducherry; RJ, Rajasthan; SK, Sikkim; TN, Tamil Nadu; TS, Telangana State; TR, Tripura; UP, Uttar Pradesh; UK, Uttarakhand (Uttaranchal); WB, West Bengal.



**eFigure 10. Comparison of age-standardized national diabetes prevalence reported in different studies<sup>a,b</sup>**

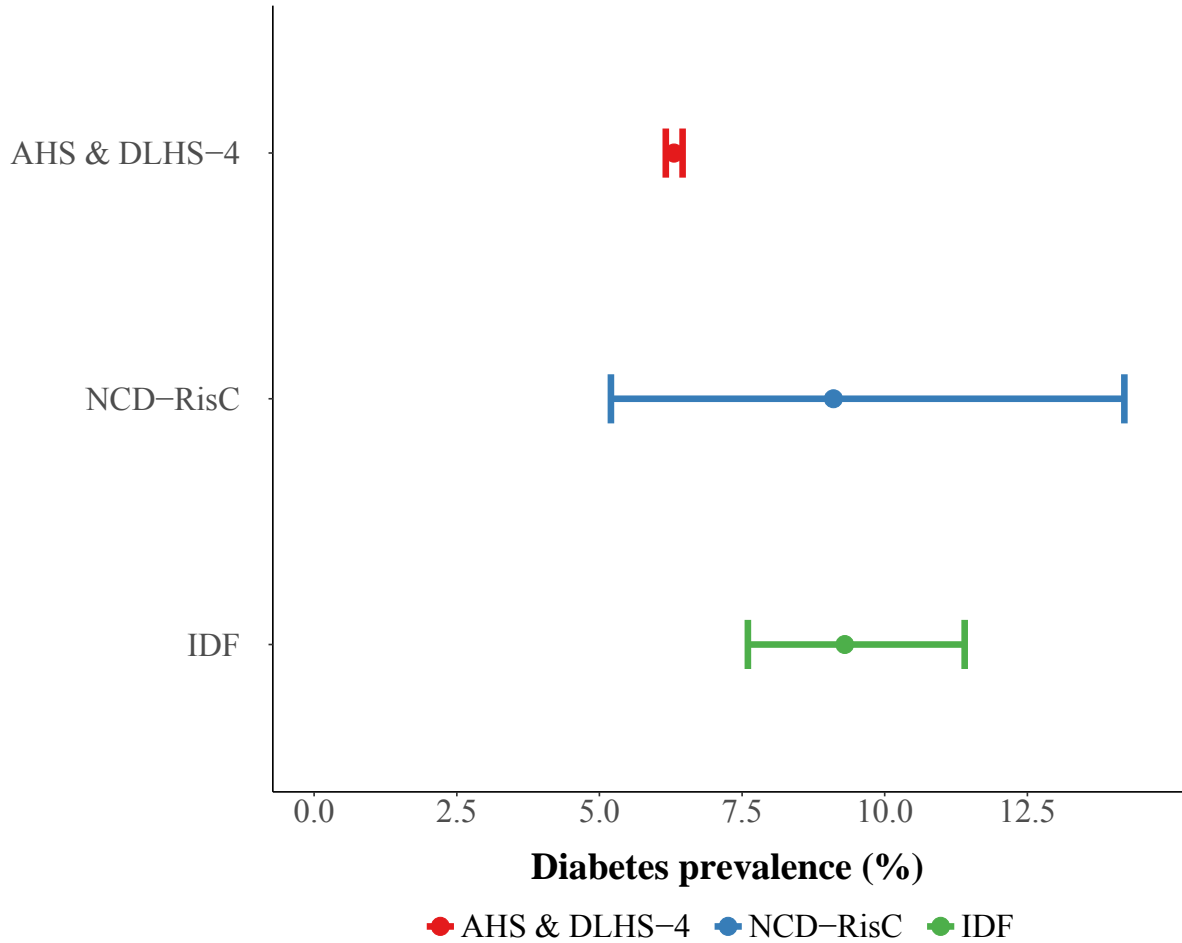

**Abbreviations:** NCD-RisC = NCD Risk Factor Collaboration; IDF = International Diabetes Federation

<sup>a</sup> The NCD-RisC estimate is for 2014 and the IDF estimate for 2015.<sup>8,9</sup>

<sup>b</sup> The horizontal bar is a 95% confidence interval (AHS & DLHS-4) or a 95% uncertainty interval (NCD-RisC and IDF).

## eReferences

1. Office of the Registrar General & Census Commissioner. 2011 Census of India. 2011; [http://www.censusindia.gov.in/2011-common/census\\_2011.html](http://www.censusindia.gov.in/2011-common/census_2011.html). Accessed February 9th, 2017.
2. Dandona R, Pandey A, Dandona L. A review of national health surveys in India. *Bulletin of the World Health Organization*. 2016;94(4):286-296a.
3. Ministry of Health and Family Welfare. *District Level Household and Facility Survey 2012-2013*. Mumbai: Government of India, International Institute of Population Sciences;2014.
4. Filmer D, Pritchett LH. Estimating wealth effects without expenditure data--or tears: an application to educational enrollments in states of India. *Demography*. 2001;38(1):115-132.
5. Ahmad OB, Boschi-Pinto C, Lopez AD, Murray CJ, Lozano R, Inoue M. Age standardization of rates: a new WHO standard. *Geneva: World Health Organization*. 2001;31:1-14.
6. Wang L, Gao P, Zhang M, et al. Prevalence and Ethnic Pattern of Diabetes and Prediabetes in China in 2013. *JAMA : the journal of the American Medical Association*. 2017;317(24):2515-2523.
7. Ministry of Home Affairs. Meetings of Zonal Councils. 2017; [http://mha.nic.in/zonal\\_council](http://mha.nic.in/zonal_council). Accessed June 20, 2017.
8. NCD Risk Factor Collaboration. Worldwide trends in diabetes since 1980: a pooled analysis of 751 population-based studies with 4.4 million participants. *Lancet*. 2016;387(10027):1513-1530.
9. International Diabetes Federation. *IDF Diabetes Atlas*. 7th ed. Brussels, Belgium: International Diabete Federation; 2015.
